# 1 *Chloroplast Genome Sequencing and Comparative Analysis for* 2 *Fine Fescue (Festuca L., Poaceae) Turfgrasses*

3 Yinjie Qiu<sup>a</sup>, Cory D. Hirsch<sup>b</sup>, Ya Yang<sup>c</sup> and Eric Watkins<sup>a\*</sup>

4 <sup>1</sup> Department of Horticultural Science, University of Minnesota, St. Paul, MN, 55108, USA;  
5 [qiuxx221@umn.edu](mailto:qiuxx221@umn.edu) (Y.Q.); [ewatkins@umn.edu](mailto:ewatkins@umn.edu) (E.W.)

6 <sup>2</sup> Department of Plant Pathology, University of Minnesota, St. Paul, MN, 55108, USA; [cdhirsch@umn.edu](mailto:cdhirsch@umn.edu) (C.  
7 H.)

8 <sup>3</sup> Department of Plant and Microbial Biology, University of Minnesota, St. Paul, MN, 55108, USA;  
9 [yayang@umn.edu](mailto:yayang@umn.edu) (Y.Y.)

10 \* Correspondence: [qiuxx221@umn.edu](mailto:qiuxx221@umn.edu) (Y.Q.); [ewatkins@umn.edu](mailto:ewatkins@umn.edu) (E.W.); Tel.: +1- 612-624-7496 (E.W.)

11 **Abstract:** Fine fescues (*Festuca* L., Poaceae) are turfgrass species that perform well in low-  
12 input environments. Based on morphological characteristics, the most commonly-utilized  
13 fine fescues are divided into five taxa: three are subspecies within *F. rubra* L. and the  
14 remaining two are treated as species within the *F. ovina* L. complex. Morphologically, these  
15 five taxa are very similar, and both identification and classification of fine fescues remain  
16 challenging. In an effort to develop identification methods for fescues, we used flow  
17 cytometry to estimate genome size, and sequenced the chloroplast genome of all five taxa.  
18 Fine fescue chloroplast genome sizes ranged from 133,331 to 133,842 bp and contained 113  
19 to 114 genes. Phylogenetic reconstruction using whole chloroplast genome sequences  
20 agreed with previous work based on morphology. Comparative genomics suggested  
21 unique repeat signatures for each fine fescue taxon that could potentially be used for  
22 marker development for taxon identification.

23 **Keywords:** Fine fescue, chloroplast genome, phylogeny, comparative genomics  
24

---

## 25 1. Introduction

26 With ca. 450 species, Fescues (*Festuca* L., Poaceae) is a large and diverse genus of  
27 perennial grasses [1]. Fescue species are distributed mostly in temperate zones of both the  
28 northern and southern hemispheres, but most commonly found in the northern hemisphere  
29 [2]. Several of the fescue species have been commonly used as turfgrass. Based on both leaf  
30 morphology and nuclear ITS sequences, fescue species can be divided into two groups:  
31 broad-leaved fescues and fine-leaved fescues [3]. Broad-leaved fescues commonly used as  
32 turfgrass include tall fescue (*F. arundinacea* Schreb.) and meadow fescue (*F. pratensis* Huds.).  
33 Fine-leaved fescues are a group of cool-season grasses that include fine fescues. Five fine  
34 fescue taxa: hard fescue (*F. brevipila* Tracey, 2n=6x=42), sheep fescue (*F. ovina* L., 2n=4x=28),  
35 strong creeping red fescue (*F. rubra* ssp. *rubra* 2n=8x=56), slender creeping red fescue (*F.*  
36 *rubra* ssp. *litoralis* (G. Mey.) Auquier 2n=6x=42), and Chewings fescue (*F. rubra* ssp. *fallax*  
37 (Thuill.) Nyman 2n=6x=42) are commonly used as perennial turfgrasses [4]. All five taxa  
38 share very fine and narrow leaves and have been used for forage, turf, and ornamental  
39 purposes. They are highly tolerant to shade and drought, prefer low pH (5.5-6.5) and low  
40 fertility soils [5]. Additionally, fine fescues grow well in the shade or sun, have reduced  
41 mowing requirements, and do not need additional fertilizer or supplemental irrigation [4].

42 Based on morphological and cytological features, fine fescues are currently divided into  
43 two groups referred to as the *F. rubra* complex (includes *F. rubra* ssp. *litoralis*, *F. rubra* ssp.  
44 *rubra*, *F. rubra* ssp. *fallax*) and the *F. ovina* complex (includes *F. brevipila* and *F. ovina*) [4].  
45 While it is relatively easy to identify fine fescue species into their proper complex, it is  
46 challenging to identify taxa within the same complex. In the *F. rubra* complex, both ssp.

47 *litoralis* and *ssp. rubra* are rhizomatous while *ssp. fallax* is non-rhizomatous. However, the  
48 separation of *ssp. litoralis* from *ssp. rubra* using rhizome length is challenging. Species  
49 identification within the *F. ovina* complex relies heavily on leaf characters; however,  
50 abundant morphological and ecotype diversity within *F. ovina* makes species identification  
51 difficult [6]. This is further complicated by inconsistent identification methods between  
52 different continents. For example, in the United States, sheep fescue is described as having  
53 a bluish gray leaf color and hard fescue leaf blade color is considered green [5], while in  
54 Europe, it is the opposite [7]. Beyond morphological classifications, laser flow cytometry has  
55 been used to determine ploidy level of fine fescues and some other fescue species [8]. A wide  
56 range of DNA contents within each complex suggests that the evolutionary history of each  
57 named species is complicated, and interspecific hybridization might interfere with species  
58 determination using this approach. Plant breeders have been working to improve fine  
59 fescues for turf use for several decades, with germplasm improvement efforts focused on  
60 disease resistance, traffic tolerance, and ability to perform well under heat stress [9].  
61 Turfgrass breeders have utilized germplasm collections from old turf areas as a source of  
62 germplasm [10]; however, confirming the species identity in these collections has been  
63 challenging. A combination of molecular markers and flow cytometry could be a valuable  
64 tool for breeders to identify fine fescue germplasm [11].

65 Due to the complex polyploidy history of fine fescues, sequencing plastid genomes  
66 provides a more cost-effective tool for taxon identification than the nucleus genome because  
67 it is maternally inherited, lack of heterozygosity, present in high copies and usable even in  
68 partially degraded material. Previous studies have developed universal polymerase chain  
69 reaction (PCR) primers to amplify non-coding polymorphic regions for DNA barcoding in  
70 plants for species identification [12, 13]. However, the polymorphisms discovered from  
71 these regions are often single nucleotide polymorphisms that are difficult to apply using  
72 PCR screening methods. For these reasons, it would be helpful to assemble chloroplast  
73 genomes and identify simple sequence repeat (SSR) polymorphism and tandem repeats.  
74 Chloroplast genome sequencing has been simplified due to improved sequencing  
75 technology. In turfgrass species, high throughput sequencing has been used to assemble the  
76 chloroplast genomes of perennial ryegrass (*Lolium perenne* cv. Cashel ) [14], tall fescue  
77 (*Lolium arundinacea* cv. Schreb) [15], diploid *Festuca ovina*, *Festuca pratensis*, *Festuca altissima*  
78 [16], and bermudagrass (*Cynodon dactylon*) [17]. To date, there is limited molecular biology  
79 information on fine fescue species identification and their phylogenetic position among  
80 other turfgrass species [16, 18]. In this study, we used flow cytometry to confirm the ploidy  
81 level of five fine fescue cultivars, each representing one of the five commonly utilized fine  
82 fescue taxon. We then reported the complete chloroplast genome sequences of these five  
83 taxa, carried out comparative genomics and phylogenetic inference. Based on the genome  
84 sequence we identified unique genome features among fine fescue taxa and predicted taxa  
85 specific SSR and tandem repeat loci for molecular marker development.

## 86 2. Results

### 87 2.1 Species Ploidy Level Confirmation

88 We used flow cytometry to estimate the ploidy levels of five fine fescue taxa by  
89 measuring the DNA content in each cell. DNA content was reflected by the flow cytometry  
90 mean PI-A value. Overall, fine fescue taxa had mean PI-A values roughly from 110 to 180  
91 (**Figure 1 and Figure S1**). *F. rubra* ssp. *rubra* cv. Navigator II ( $2n=8x=56$ ) had the highest mean  
92 PI-A value (181.434, %rCV 4.4%). *F. rubra* ssp. *litoralis* cv. Shoreline ( $2n=6x=42$ ) and *F. rubra*

93 *ssp. fallax* cv. Treasure II ( $2n=6x=42$ ) had similar mean PI-A values of 137.852, %rCV 3.7 and  
 94 145.864, %rCV 3.5, respectively. *F. brevipila* cv. Beacon ( $2n=6x=42$ ) had a mean PI-A of 165.25,  
 95 %rCV 1.9, while *F. ovina* cv. Quatro ( $2n=4x=28$ ) had a mean PI-A of 108.43, %rCV 2.9.  
 96 Standard reference *L. perenne* cv. Artic Green ( $2n=2x=14$ ) had a G1 phase mean PI-A of 63.91,  
 97 %rCV 3.0. USDA *F. ovina* PI 230246 ( $2n=2x=14$ ) had a G1 mean PI-A of 52.73 (histogram not  
 98 shown). The estimated genome size of USDA PI 230246 was 4.67 pg/2C. Estimated ploidy  
 99 level of *F. brevipila* cv. Beacon was 6.3, *F. ovina* cv. Quatro was 4.11, *F. rubra* ssp. *rubra* cv.  
 100 Navigator II was 6.9, *F. rubra* ssp. *litoralis* cv. Shoreline was 5.2, and *F. rubra* ssp. *fallax* cv.  
 101 Treasure II was 5.5 (Table 1). All newly estimated ploidy levels roughly correspond to  
 102 previously reported ploidy levels based on chromosome counts.

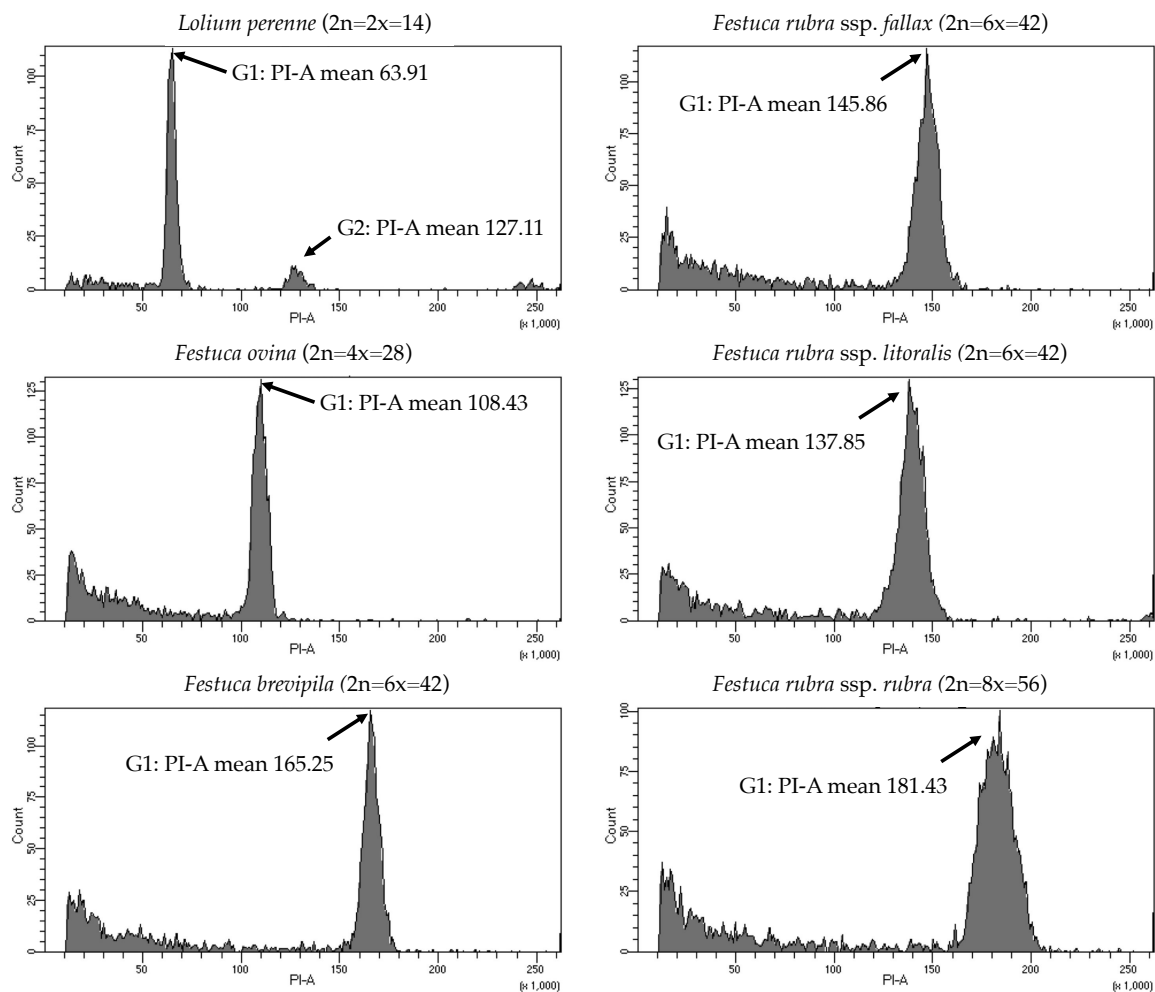

103

104 **Figure 1.** Flow cytometry results for the five fine fescue taxa. *Lolium* ( $2n=2x=14$ ) was used as the  
 105 reference. Flow cytometry was able to separate *F. rubra* ssp. *rubra* from the other two subspecies in  
 106 the *F. rubra* complex. The mean PI-A values of *F. rubra* ssp. *fallax* and *F. rubra* ssp. *litoralis* were similar  
 107 (145.86 to 137.85).

108 **Table 1:** Summary of flow cytometry statistics, genome size estimation, and ploidy level estimation  
 109 of fine fescue species. *Lolium perenne* 2C DNA content was used to calculate fine fescue and USDA *F.*  
 110 *ovina* PI 230246 genome size, calculated PI 230246 DNA content was used as reference to infer fine  
 111 fescue ploidy level

| Species name | Chromosome count | Cultivar name | Mean PI-A | %rCV * | Estimated Genome Size (pg/Nuclei) | Estimated Ploidy Level |
|--------------|------------------|---------------|-----------|--------|-----------------------------------|------------------------|
|--------------|------------------|---------------|-----------|--------|-----------------------------------|------------------------|

|                                       |          |              |       |     |      |     |
|---------------------------------------|----------|--------------|-------|-----|------|-----|
| <i>F. brevipila</i>                   | 2n=6x=42 | Beacon       | 165.3 | 1.9 | 14.6 | 6.3 |
| <i>F. ovina</i>                       | 2n=4x=28 | Quatro       | 108.4 | 2.9 | 9.6  | 4.1 |
| <i>F. ovina</i> PI 230246             | 2n=2x=14 | NA           | 52.7  | 3.1 | 4.7  | 1.7 |
| <i>F. rubra</i> ssp. <i>rubra</i>     | 2n=8x=56 | Navigator II | 181.4 | 4.4 | 16.1 | 6.9 |
| <i>F. rubra</i> ssp. <i>litoralis</i> | 2n=6x=42 | Shoreline    | 137.9 | 3.7 | 12.2 | 5.2 |
| <i>F. rubra</i> ssp. <i>fallax</i>    | 2n=6x=42 | Treasure II  | 145.9 | 3.5 | 12.9 | 5.5 |
| <i>L. perenne</i>                     | 2n=2x=14 | Artic Green  | 63.9  | 3.0 | 5.7  | 2.0 |

112 \* %rCV: Quality of laser alignment. Low %rCV suggests high resolution sensitivity.

## 113 2.2 Plastid Genome Assembly and Annotation of Five Fescue Taxa

114 A total of 47,843,878 reads were produced from the five fine fescue taxa. After Illumina  
 115 adaptor removal, we obtained 47,837,438 reads. The assembled chloroplast genomes ranged  
 116 from 133,331 to 133,842 bp. The large single copy (LSC) and small single copy (SSC) regions  
 117 were similar in size between the sequenced fine fescue accessions (78 kb and 12 kb,  
 118 respectively). *Festuca ovina* and *F. brevipila* in the *F. ovina* complex had exactly the same size  
 119 inverted repeat (IR) region (42,476 bp). In the *F. rubra* complex, *F. rubra* ssp. *rubra* and *F.*  
 120 *rubra* ssp. *litoralis* had the same IR size (21,235 bp). Species in the *F. rubra* complex had a  
 121 larger chloroplast genome size compared to species in the *F. ovina* complex. All chloroplast  
 122 genomes shared similar GC content (38.4%) (Figure 2, Table 2). The fine fescue chloroplast  
 123 genomes encoded for 113-114 genes, including 37 transfer RNAs (tRNA), 4 ribosomal RNAs  
 124 (rRNA), and 72 protein-coding genes (Table 2). Genome structures were similar among all  
 125 five fine fescue taxa sequenced, except that the pseudogene *accD* was annotated in all three  
 126 subspecies of *F. rubra*, but not in the *F. ovina* complex (Table 3).

127

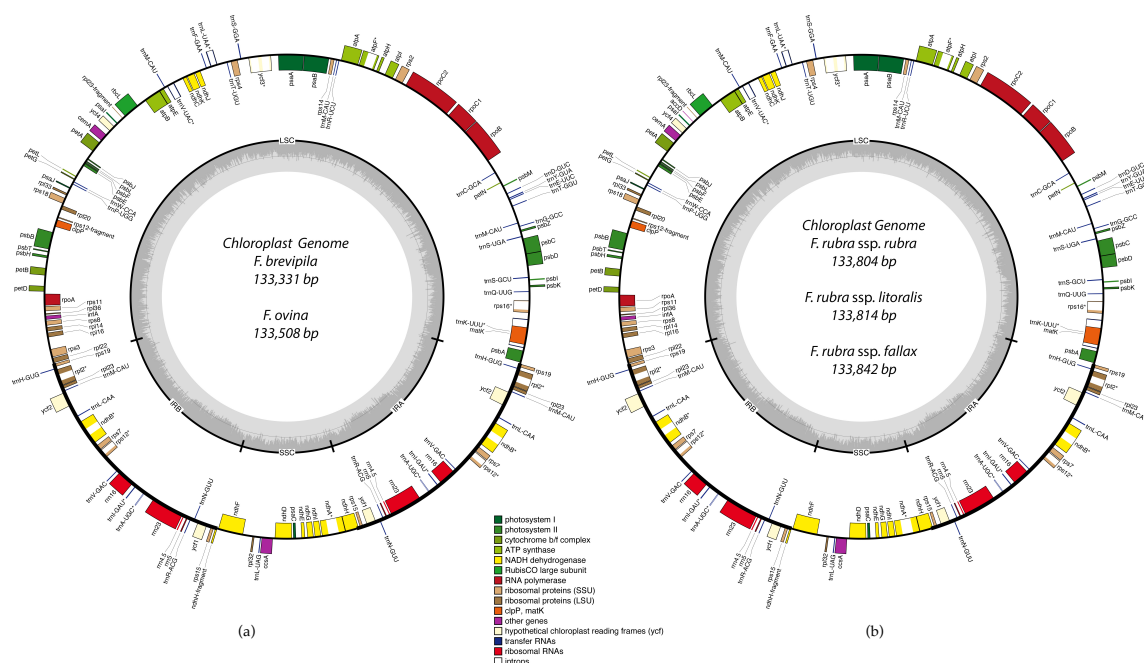

128

129 **Figure 2:** Whole chloroplast genome structure of *F. ovina* complex (a) and *F. rubra* complex (b). Genes  
 130 inside the circle are transcribed clockwise, genes outside are transcribed counter-clockwise. Genes  
 131 belong to different functional groups are color coded. GC content is represented by the dark gray  
 132 inner circle, the light gray corresponded to the AT content. IRA(B), inverted repeat A(B); LSC, large  
 133 single copy region; SSC, small single copy region.

134

**Table 2:** Characteristics of fine fescue chloroplast genomes.

|                           | <i>F. brevipila</i><br>cv. Beacon | <i>F. ovina</i><br>cv.<br>Quatro | <i>F. rubra</i><br>ssp. <i>rubra</i><br>cv. Navigator<br>II | <i>F. rubra</i><br>ssp. <i>litoralis</i><br>cv.<br>Shoreline | <i>F. rubra</i><br>ssp. <i>fallax</i><br>cv.<br>Treasure II |
|---------------------------|-----------------------------------|----------------------------------|-------------------------------------------------------------|--------------------------------------------------------------|-------------------------------------------------------------|
| Total Genome Size<br>(bp) | 133,331                           | 133,508                          | 133,804                                                     | 133,814                                                      | 133,842                                                     |
| Large Single Copy<br>(bp) | 78,462                            | 78,632                           | 78,888                                                      | 78,909                                                       | 78,882                                                      |
| Small Single Copy<br>(bp) | 12,393                            | 12,400                           | 12,446                                                      | 12,435                                                       | 12,452                                                      |
| Inverted Repeat (bp)      | 42,476                            | 42,476                           | 42,470                                                      | 42,470                                                       | 42,508                                                      |
| Ratio of LSC (%)          | 58.85                             | 58.9                             | 58.96                                                       | 58.97                                                        | 58.94                                                       |
| Ratio of SSC (%)          | 9.29                              | 9.29                             | 9.3                                                         | 9.29                                                         | 9.3                                                         |
| Ratio of IRs (%)          | 31.86                             | 31.82                            | 31.74                                                       | 31.74                                                        | 31.76                                                       |
| GC content (%)            | 38.4                              | 38.4                             | 38.4                                                        | 38.4                                                         | 38.4                                                        |

135

**Table 3.** Fine fescue chloroplast genomes gene content by gene category.

| Category                  | Group of Gene                           | Name of gene                   |                               |                               |                                |
|---------------------------|-----------------------------------------|--------------------------------|-------------------------------|-------------------------------|--------------------------------|
|                           | Ribosomal<br>RNA genes<br>(4/8)         | <i>rrn4.5</i> <sup>a</sup>     | <i>rrn5</i> <sup>a</sup>      | <i>rrn16</i> <sup>a</sup>     | <i>rrn23</i> <sup>a</sup>      |
|                           |                                         | <i>trnA</i> -UGC <sup>*a</sup> | <i>trnC</i> -GCA              | <i>trnD</i> -GUC              | <i>trnE</i> -UUC               |
|                           |                                         | <i>trnF</i> -GAA               | <i>trnG</i> -GCC              | <i>trnH</i> -GUG <sup>a</sup> | <i>trnI</i> -GAU <sup>*a</sup> |
|                           |                                         | <i>trnK</i> -UUU <sup>*</sup>  | <i>trnL</i> -CAA <sup>a</sup> | <i>trnL</i> -UAA <sup>*</sup> | <i>trnL</i> -UAG               |
|                           | Transfer RNA<br>genes (27/38)           | <i>trnM</i> -CAU <sup>c</sup>  | <i>trnN</i> -GUU <sup>a</sup> | <i>trnP</i> -UGG              | <i>trnQ</i> -UUG               |
|                           |                                         | <i>trnR</i> -ACG <sup>a</sup>  | <i>trnR</i> -UCU              | <i>trnS</i> -GCU              | <i>trnS</i> -GGA               |
|                           |                                         | <i>trnS</i> -UGA               | <i>trnT</i> -GGU              | <i>trnT</i> -UGU              | <i>trnV</i> -GAC <sup>a</sup>  |
|                           |                                         | <i>trnV</i> -UAC <sup>*</sup>  | <i>trnW</i> -CCA              | <i>trnY</i> -GUA              |                                |
|                           | Small subunit<br>of ribosome<br>(12/16) | <i>rps2</i>                    | <i>rps3</i>                   | <i>rps4</i>                   | <i>rps7</i> <sup>a</sup>       |
|                           |                                         | <i>rps8</i>                    | <i>rps11</i>                  | <i>rps12</i> <sup>*ab</sup>   | <i>rps14</i>                   |
|                           |                                         | <i>rps15</i> <sup>a</sup>      | <i>rps16</i> <sup>*</sup>     | <i>rps18</i>                  | <i>rps19</i> <sup>a</sup>      |
|                           | Large subunit<br>of ribosome<br>(9/11)  | <i>rpl2</i> <sup>*a</sup>      | <i>rpl14</i>                  | <i>rpl16</i>                  | <i>rpl20</i>                   |
|                           |                                         | <i>rpl22</i>                   | <i>rpl23</i> <sup>a</sup>     | <i>rpl32</i>                  | <i>rpl33</i>                   |
|                           |                                         | <i>rpl36</i>                   |                               |                               |                                |
|                           | RNA<br>polymerase<br>subunits (4)       | <i>rpoA</i>                    | <i>rpoB</i>                   | <i>rpoC1</i>                  | <i>rpoC2</i>                   |
| Photosynthesis<br>(45/46) | Subunits of<br>Photosystem I<br>(6)     | <i>psaA</i>                    | <i>psaB</i>                   | <i>psaC</i>                   | <i>psaI</i>                    |
|                           |                                         | <i>psaJ</i>                    | <i>ycf3</i> <sup>**</sup>     |                               |                                |

|                      |                                                                 |                                                          |                                                          |                                                          |                                           |
|----------------------|-----------------------------------------------------------------|----------------------------------------------------------|----------------------------------------------------------|----------------------------------------------------------|-------------------------------------------|
|                      | Subunits of Photosystem II (15)                                 | <i>psbA</i><br><i>psbE</i><br><i>psbJ</i><br><i>psbN</i> | <i>psbB</i><br><i>psbF</i><br><i>psbK</i><br><i>psbT</i> | <i>psbC</i><br><i>psbH</i><br><i>psbL</i><br><i>psbZ</i> | <i>psbD</i><br><i>psbI</i><br><i>psbM</i> |
|                      | Subunits of cytochrome (6)                                      | <i>petA</i><br><i>petL</i>                               | <i>petB</i><br><i>petN</i>                               | <i>petD</i>                                              | <i>petG</i>                               |
|                      | Subunits of ATP synthase (6)                                    | <i>atpA</i><br><i>atpH</i>                               | <i>atpB</i><br><i>atpI</i>                               | <i>atpE</i>                                              | <i>atpF*</i>                              |
|                      | Large subunit of Rubisco (1)                                    | <i>rbcL</i>                                              |                                                          |                                                          |                                           |
|                      | Subunits of NADH Dehydrogenase (11/12)                          | <i>ndhA*</i><br><i>ndhE</i><br><i>ndhI</i>               | <i>ndhB**a</i><br><i>ndhF</i><br><i>ndhJ</i>             | <i>ndhC</i><br><i>ndhG</i><br><i>ndhK</i>                | <i>ndhD</i><br><i>ndhH</i>                |
|                      | Translational initiation factor (1)                             | <i>infA</i>                                              |                                                          |                                                          |                                           |
|                      | Maturase (1)                                                    | <i>matK</i>                                              |                                                          |                                                          |                                           |
|                      | Envelope membrane protein (1)                                   | <i>cemA</i>                                              |                                                          |                                                          |                                           |
| Other genes (5)      | C-type cytochrome (1)                                           | <i>cssA</i>                                              |                                                          |                                                          |                                           |
|                      | Protease (1)                                                    | <i>clp</i>                                               |                                                          |                                                          |                                           |
|                      | Acetyl-coenzyme A carboxylase carboxyl transferase subunit beta | <i>accD<sup>§</sup></i>                                  |                                                          |                                                          |                                           |
| Unknown function (5) | Conserved open reading frames (3/5)                             | <i>ycf1<sup>a</sup></i>                                  | <i>ycf2<sup>a</sup></i>                                  | <i>ycf4</i>                                              |                                           |

136 <sup>a</sup> Two gene copies in IRs; <sup>b</sup> Gene divided into two independent transcription units; <sup>c</sup> Gene that has five copies; \*  
 137 One intron-containing genes; \*\* Two intron-containing genes. <sup>§</sup> Gene annotated in *F. rubra* spp. only. Fine fescue  
 138 species chloroplast genomes share high structure similarity and gene content. Acetyl-coenzyme A carboxylase  
 139 carboxyl transferase subunit beta pseudogene is annotated in *F. rubra* ssp.

### 140 2.3 Chloroplast Genome IR Expansion and Contraction

141 Contraction and expansion of the IR regions resulted in the size variation of chloroplast  
 142 genomes. We examined the four junctions in the chloroplast genomes, LSC/IRa, LSC/IRb,

143 SSC/IRa, and SSC/IRb of the fine fescue and the model turfgrass species *L. perenne*. Although  
 144 the chloroplast genome of fine fescue species was highly similar, some structural variations  
 145 were still found in the IR/LSC and IR/SSC boundary. Similar to *L. perenne*, fine fescue species  
 146 chloroplast genes *rpl22-rps19*, *rps19-psbA* were located in the junction of IR and LSC; *rps15-*  
 147 *ndhF* and *ndhH-rps15* were located in the junction of IR/SSC. In the *F. ovina* complex, the  
 148 *rps19* gene was 37 bp into the LSC/IRb boundary while in the *F. rubra* complex and *L. perenne*,  
 149 the *rps19* gene was 36 bp into the LSC/IRb boundary (**Figure 3**). The *rps15* gene was 308 bp  
 150 from the IRb/SSC boundary in *F. ovina* complex, 307 bp in *F. rubra* complex, and 302 bp in *L.*  
 151 *perenne*. Both the *ndhH* and the pseudogene fragment of the *ndhH* (*ψndhH*) genes panned the  
 152 junction of the IR/SSC. The *ψndhH* gene crossed the IRb/SSC boundary with 10 bp into SSC  
 153 in *F. brevipila* and *F. ovina*, 21 bp in *F. rubra* ssp. *rubra*, 4 bp in *F. rubra* ssp. *litoralis* and *F. rubra*  
 154 ssp. *fallax*, and 7 bp in *L. perenne*. The *psbA* gene was 87 bp apart from the IRa/LSC boundary  
 155 into the LSC in *L. perenne* and *F. ovina* complex species but 83 bp in the *F. rubra* complex.

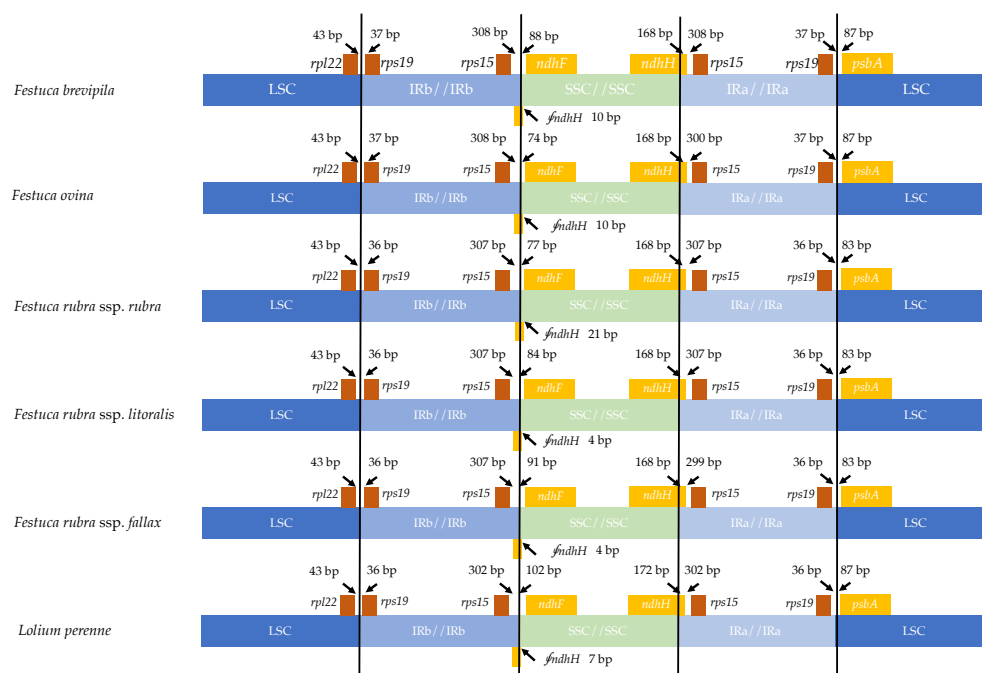

156

157 **Figure 3.** Comparison for border positions of LSC, SSC and IR regions among five fine fescues and *L.*  
 158 *perenne*. Genes are denoted by boxes, and the gap between the genes and the boundaries are indicated  
 159 by the number of bases unless the gene coincides with the boundary. Extensions of genes are also  
 160 indicated above the boxes.

#### 161 2.4 Whole Chloroplast Genome Comparison and Repetitive Element Identification

162 Genome-wide comparison among five fine fescue taxa showed high sequence similarity  
 163 with most variations located in intergenic regions (**Figure 4**). To develop markers for species  
 164 screening, we predicted a total of 217 SSR markers for fine fescue taxa sequenced (*F. brevipila*  
 165 39; *F. ovina* 45; *F. rubra* ssp. *rubra* 45; *F. rubra* ssp. *litoralis* 46; *F. rubra* ssp. *fallax* 42) that  
 166 included 17 different repeat types for the fine fescue species (**Figure 5a, Table S1**). The most  
 167 frequent repeat type was A/T repeats, followed by AT/AT. The pentamer AAATT/AATTT  
 168 repeat was only presented in the rhizomatous *F. rubra* ssp. *litoralis* and *F. rubra* ssp. *rubra*,  
 169 while ACCAT/ATGGT was only found in *F. ovina* complex species *F. brevipila* and *F. ovina*.  
 170 Similar to SSR loci prediction, we also predicted long repeats for the fine fescue species and  
 171 identified a total of 171 repeated elements ranging in size from 20 to 51 bp (**Figure 5b, Table**  
 172 **S2**). Complementary (C) matches were only identified in *F. brevipila* and *F. ovina*. *F. rubra*

173 species had more palindromic (P) and reverse (R) matches. Number of forward (F) matches  
 174 were similar between five taxa.

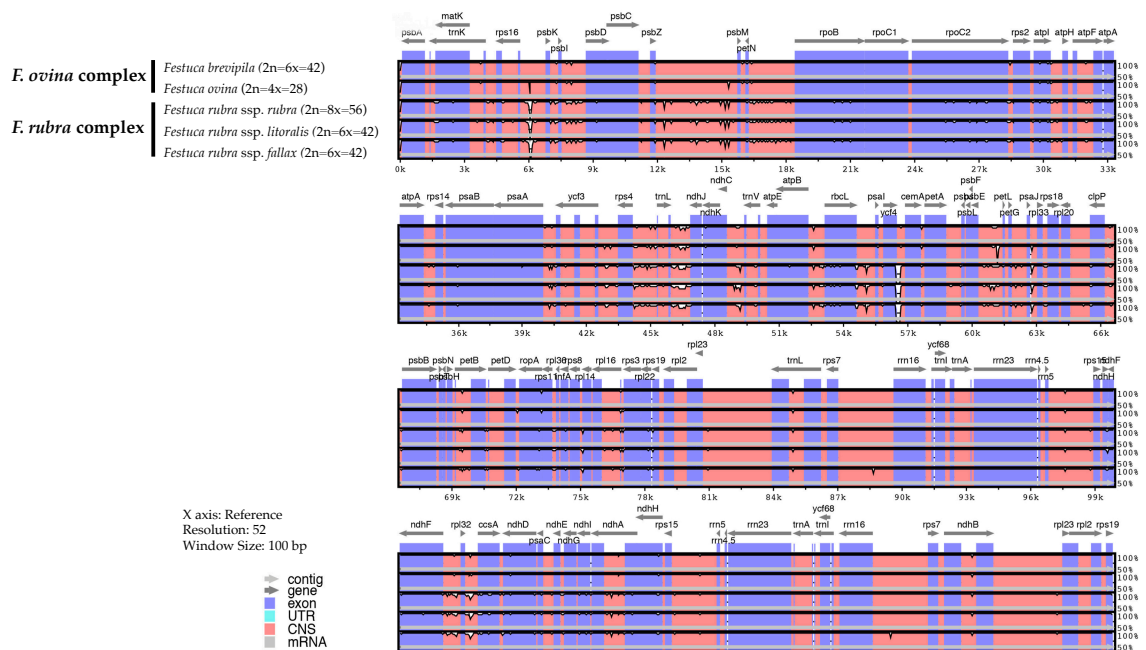

175  
 176 **Figure 4.** Sequence identity plot of fine fescues chloroplast genome sequences with *F. ovina* (2x) as the  
 177 reference using mVISTA. A cut-off of 70% identify was used for the plots, and the percent of identity  
 178 varies from 50% to 100% as noted on the y-axis. Most of the sequence variation between fine fescues  
 179 were in intergenic regions. Species in the *F. ovina* complex, *F. brevipila* and *F. ovina* showed high  
 180 sequence similarity. Similarly, subspecies within *F. rubra* complex also showed high sequence  
 181 similarity.

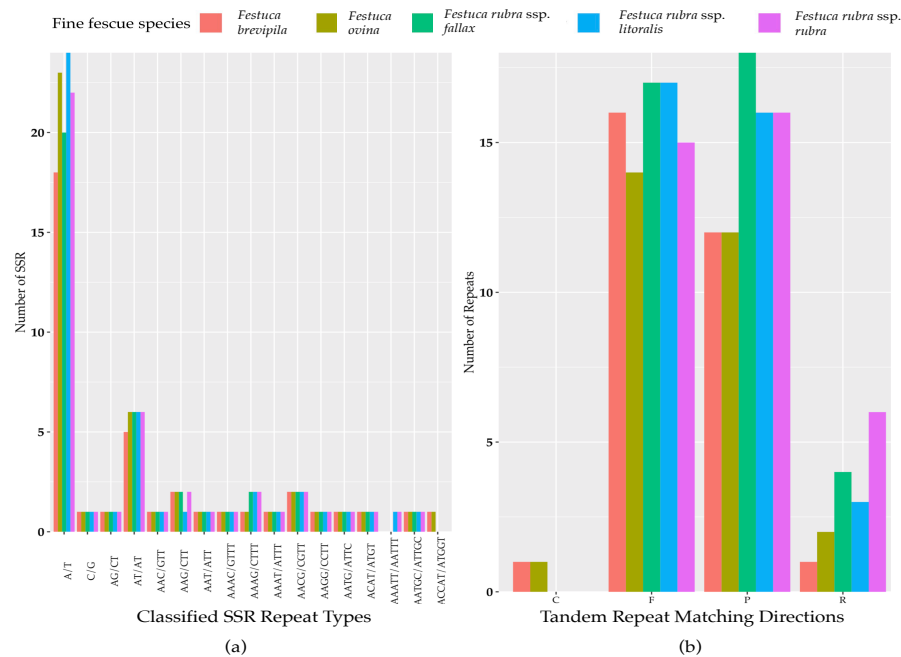

182  
 183 **Figure 5.** (a) SSR repeat type and numbers in the five fine fescue taxa sequenced. Single nucleotide  
 184 repeat type has the highest frequency. No hexanucleotide repeats were identified in the fine fescue  
 185 chloroplast genomes sequenced. One penta-nucleotide repeat type (AAATT/AATTT) is unique to *F.*



186 *rubra* ssp. *rubra* and *F. rubra* ssp. *litoralis*; One penta-nucleotide repeat type (ACCAT/ATGGT) is  
 187 unique to *F. brevipila* and *F. ovina* (b) Long repeats sequences in fine fescue chloroplast genomes.  
 188 Complement (C) match was only identified in the *F. ovina* complex; Reverse (R) match has the most  
 189 number variation in fine fescues.

## 190 2.5 SNP and InDel Distribution in the Coding Sequence of Five Fine Fescue Species

191 To identify single nucleotide polymorphisms (SNPs) we used the diploid *F. ovina* gff3  
 192 file (JX871940.1) as the template gene model to count SNPs distribution. We found more  
 193 SNPs were located within intergenic regions in the *F. ovina* complex, while in the *F. rubra*  
 194 complex, SNPs were located evenly between gene coding and intergenic regions. Most  
 195 InDels were located in intergenic regions of the fine fescue species (**Table 3**). Between *F.*  
 196 *ovina* and the *F. rubra* complex, the *ropC2* gene had the most SNPs (4 vs 31). *rbcL* gene also  
 197 has a high level of variation (1 vs 14.3). *rpoB*, *ccsA*, NADH dehydrogenase subunit genes  
 198 (*ndhH*, *ndhF*, *ndhA*), and ATPase subunit genes (*atpA*, *atpB*, *atpF*) also showed variation  
 199 between *F. ovina* and *F. rubra* complexes. Less SNP and InDel variation were found within  
 200 each complex (**Table 4**, **Table S3** and **S4**).

201 **Table 4.** Distribution of SNPs and InDels for the five fine fescue taxa sequenced in this study.

| Species                                       | <i>F. brevipila</i> | <i>F. ovina</i> | <i>F. rubra</i><br>ssp. <i>rubra</i> | <i>F. rubra</i><br>ssp.<br><i>litoralis</i> | <i>F. rubra</i><br>ssp. <i>fallax</i> |
|-----------------------------------------------|---------------------|-----------------|--------------------------------------|---------------------------------------------|---------------------------------------|
| Total number of SNPs                          | 98                  | 134             | 638                                  | 615                                         | 624                                   |
| SNPs in the coding region                     | 35                  | 52              | 306                                  | 301                                         | 300                                   |
| SNPs in intergenic region                     | 63                  | 82              | 332                                  | 314                                         | 324                                   |
| Percentage of SNPs in the intergenic region   | 64.29               | 61.19           | 52.04                                | 51.06                                       | 51.92                                 |
| Total number of InDels                        | 112                 | 102             | 149                                  | 156                                         | 149                                   |
| InDels in the coding region                   | 22                  | 17              | 27                                   | 26                                          | 27                                    |
| InDels in intergenic region                   | 90                  | 85              | 122                                  | 130                                         | 122                                   |
| Percentage of InDels in the intergenic region | 80.36               | 83.33           | 81.88                                | 83.33                                       | 81.88                                 |

## 202 2.6 Nucleotide Diversity and Mutation Hotspot Identification

203 A sliding window analysis successfully detected highly variable regions in the fine  
 204 fescue chloroplast genomes (**Figure 6**, **Table S5**). The average nucleotide diversity ( $\Pi$ )  
 205 among fine fescue species was relatively low (0.00318). The IR region showed lower  
 206 variability than the LSC and SSC region. There were several divergent loci having a  $\Pi$  value  
 207 greater than 0.01 (*psbK-psbI*, *trnfM-trnE*, *trnC-rpoB*, *psbH-petB*, *trnL-trnF*, *trnS-rps4*, *atpB-rbcL*-  
 208 *psaI*, and *rpl32-trnL*), but mostly within intergenic regions. The *rbcL-psaI* region contained a  
 209 highly variable *accD-like* region in some species, we looked at the structural variation of 10  
 210 species in the *Festuca - Lolium* complex. We found species in broad-leaved fescue and *F. rubra*  
 211 complex had similar structure, while *F. ovina* (2x, 4x) and *F. brevipila* had a 276 bp deletion  
 212 in the *rbcL-psaI* intergenic region (**Figure 7**).

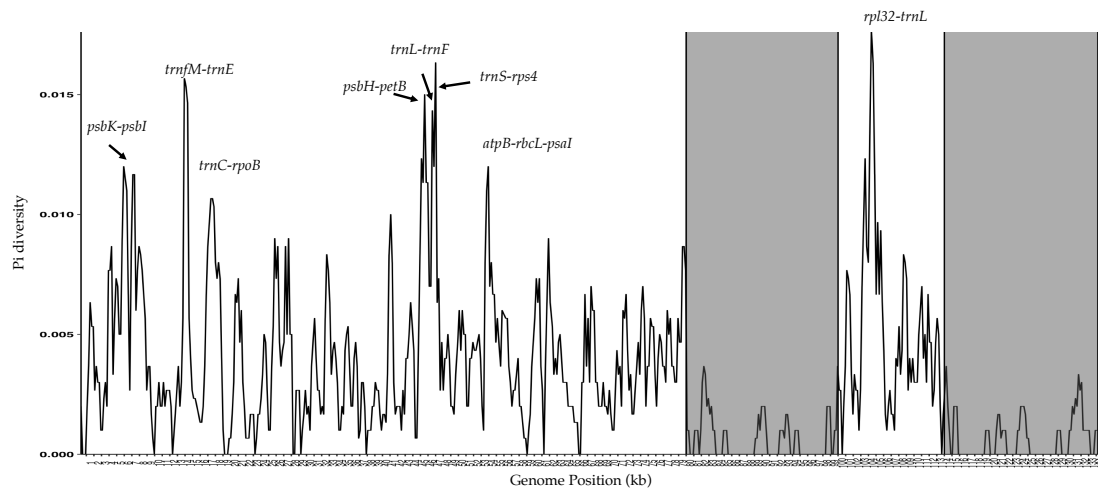

213

214 **Figure 6.** Sliding window analysis of fine fescue whole chloroplast genomes. Window size: 600 bp,  
 215 step size: 200 bp. X-axis: the position of the midpoint of a window (kb). Y-axis: nucleotide diversity  
 216 of each window. Inverted repeat regions are highlighted in grey. *rpl32-trnL* region has the most  
 217 nucleotide diversity followed by *psbH-petB-trnL-trnF-trnS-rps4* region.

218

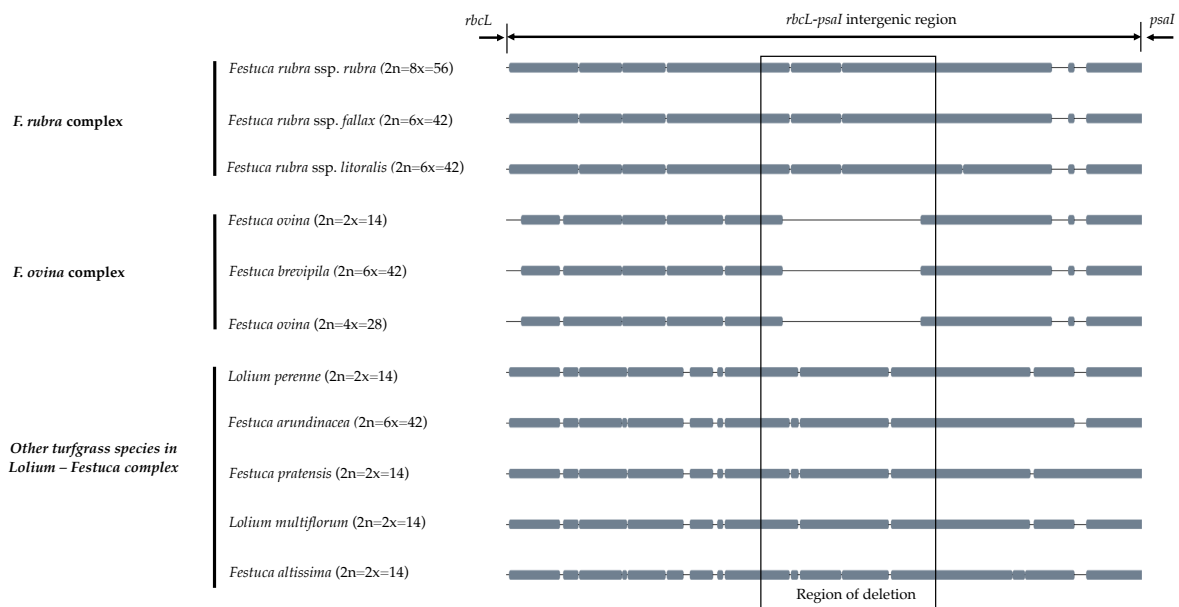

219

220 **Figure 7.** Alignment of *rbcL-psaI* intergenic sequence alignment shows the pseudogene *accD* is missing  
 221 in both *F. ovina* (2x, 4x) and *F. brevipila* but present in the *Festuca rubra* complex and other species  
 222 examined in this study. Species were ordered by complexes.

## 223 2.7 Phylogenetic Reconstruction of Fine Fescue Species

224 We reconstructed the phylogenetic relationships of species within the *Festuca - Lolium*  
 225 complex using the chloroplast genomes sequenced in our study and eight publicly available  
 226 complete chloroplast genomes including six species within the *Festuca-Lolium* complex  
 227 (**Figure 8**). The dataset included 125,824 aligned characters, of which 3,923 were parsimony-  
 228 informative and 91.11% characters are constant. The five fine fescue taxa were split into two  
 229 clades ([ML]BS=100). In the *F. ovina* complex, two *F. ovina* accessions included in the

230 phylogenetic analysis, a diploid one from GenBank, and a tetraploid one newly sequenced  
 231 in this study are paraphyletic to *F. brevipila* ([ML]BS=100). All three subspecies of *F. rubra*  
 232 formed a strongly supported clade ([ML]BS=100). Together they are sisters to the *F. ovina*  
 233 complex ([ML]BS=100).

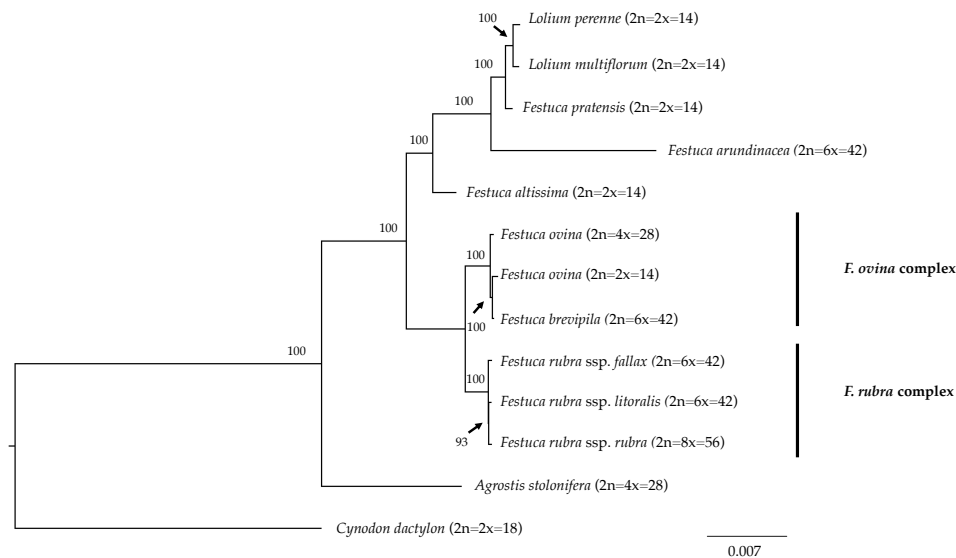

234

235 **Figure 8.** Maximum likelihood (ML) phylogram of the *Festuca* - *Lolium* complex with 1,000 bootstrap  
 236 replicates. Fine fescues were grouped into previous named complexes (*F. ovina* and *F. rubra*), sister to  
 237 broad leaved fescues in the *Festuca* - *Lolium* complex.

### 238 3. Discussion

239 In this study, we used flow cytometry to determine the ploidy level of five fine fescue  
 240 cultivars, assembled the chloroplast genomes for each, and identified structural variation  
 241 and mutation hotspots. We also identified candidate SSR loci for marker development to  
 242 facilitate fine fescue species identification. Additionally, we reconstructed the phylogenetic  
 243 relationships of the *Festuca-Lolium* complex using plastid genome information generated in  
 244 this study along with other publicly-available plastid genomes.

245 Flow cytometry was able to separate *F. brevipila* cv. Beacon, *F. ovina* cv. Quatro and *F.*  
 246 *rubra* ssp. *rubra* cv. Navigator II based on the mean PI-A value. We noticed that the average  
 247 mean PI-A of the diploid *L. perenne* (63.91) was higher than the mean PI-A of diploid *F. ovina*  
 248 (52.73), suggesting that *F. ovina* species has smaller genome size than *L. perenne*. The ploidy  
 249 estimation in the *F. ovina* complex are fairly consistent while the estimations of genome sizes  
 250 in the *F. rubra* complex are smaller than we expected, even though these two complexes are  
 251 closely related. Indeed, a similar finding was reported by Huff et al [8] that *F. brevipila* has a  
 252 larger genome size than *F. rubra* ssp. *litoralis* and *F. rubra* ssp. *fallax*, both of which have the  
 253 same ploidy level as *F. brevipila*. The range of variation in DNA content within each complex  
 254 suggest a complicated evolutionary history in addition to polyploidization [8].

255 While most crop plants are highly distinctive from their close relatives, *Festuca* is a  
 256 species-rich genus that contains species with highly similar morphology and different  
 257 ploidy level. Consequently, it is difficult for researchers to interpret species identity. In our  
 258 case, it is most difficult to distinguish between *F. rubra* ssp. *litoralis* cv. Shoreline and *F. rubra*

259 *ssp. fallax* cv. Treasure II as they had similar PI-A values based on flow cytometry. Thus, we  
260 need different approaches to identify them. The presence and absence of rhizome formation  
261 could be taken into consideration; for example, *F. rubra* *ssp. fallax* cv. Treasure II is a bunch  
262 type turfgrass, while *F. rubra* *ssp. litoralis* cv. Shoreline forms short and slender rhizomes  
263 [20]. This method may not be effective, however, because rhizome formation can be greatly  
264 affected by environmental conditions [21, 22].

265 To further develop molecular tools to facilitate species identification, we carried out  
266 chloroplast genome sequencing. We assembled the complete chloroplast genomes of five  
267 low-input turfgrass fine fescues using Illumina sequencing. Overall, the chloroplast  
268 genomes had high sequence and structure similarity among all five fine fescue taxa  
269 sequenced, especially within each complex. All five chloroplast genomes share similar gene  
270 content except for the three species in the *F. rubra* complex that have a pseudogene Acetyl-  
271 coenzyme A carboxylase carboxyl transferase subunit (*accD*). The *accD* pseudogene is either  
272 partially or completely absent in some monocots. Instead, a nuclear-encoded ACC enzyme  
273 has been found to replace the plastic *accD* gene function in some angiosperm lineage [23].  
274 Indeed, even though the *accD* pseudogene is missing in the *F. brevipila* chloroplast genome,  
275 the gene transcript was identified in a transcriptome sequencing dataset (unpublished data),  
276 suggesting that this gene has been translocated to nucleus genome. Previous studies have  
277 shown that broad-leaf fescues, *L. perenne*, *O. sativa*, and *H. vulgare* all had the pseudogene  
278 *accD* gene, while it was absent in diploid *F. ovina*, *Z. mays*, *S. bicolor*, *T. aestivum*, and *B.*  
279 *distachyon* [16]. Broad-leaf and fine-leaf fescues diverged around 9 Mya ago [24], which  
280 raises an interesting question about the mechanisms of the relocation of *accD* among closely  
281 related taxa in the *Festuca-Lolium* complex and even within fine fescue species.

282 In plants, chloroplast genomes are generally considered “single copy” and lack of  
283 recombination due to maternal inheritance [25]. For this reason, chloroplast genomes are  
284 convenient for developing genetic markers for distinguishing species and subspecies. We  
285 have identified a number of repeat signatures that are unique to a single species or species  
286 complex in fine fescue. For example, complement match is only identified in *F. ovina*  
287 complex, and *F. rubra* complex has more reversed matches. We also identified two SSR  
288 repeats unique to each of the two complexes. The first one consists of AAATT/AATTT repeat  
289 units is unique to *F. rubra* *ssp. litoralis* and *F. rubra* *ssp. rubra*, and the second one consists of  
290 ACCAT/ATGGT repeat units is unique to *F. brevipila* and *F. ovina*. In cases like the  
291 identification of hexaploids *F. brevipila*, *F. rubra* *ssp. fallax*, and *Festuca rubra* *ssp. litoralis*, it  
292 is critical to have these diagnostic repeats given all three taxa share similar PI-A values from  
293 flow cytometry. Taxon-specific tandem repeat could also aid the SSR repeats for species  
294 identification. Nucleotide diversity analysis suggested that several variable genome regions  
295 exist among the five fine fescue taxa sequenced in this study. These variable regions  
296 included previously known highly variable chloroplast regions such as *trnL-trnF* and *rpl32-*  
297 *trnL* [13, 26]. These regions have undergone rapid nucleotide substitution and are  
298 potentially informative molecular markers for characterization of fine fescue species.

299 Phylogeny inferred from DNA sequence is valuable for understanding the evolutionary  
300 context of a species. The phylogenetic relationship of fine fescue using whole plastid  
301 genome sequences agrees with previous classification based on genome size estimation and  
302 morphology [8, 18]. The *F. ovina* complex includes *F. ovina* and *F. brevipila* and the *F. rubra*  
303 complex includes *F. rubra* *ssp. rubra*, *F. rubra* *ssp. litoralis* and *F. rubra* *ssp. fallax*, with the two  
304 rhizomatous subspecies (*ssp. rubra* and *ssp. litoralis*) being sister to each other. Within the  
305 *Festuca – Lolium* complex, fine fescues are monophyletic and together sister to a clade  
306 consists of broad-leaved fescues and *Lolium*. In our analysis, *F. brevipila* (6x) is nested within

307 *F. ovina* and sister to the diploid *F. ovina*. It is likely that *F. brevipila* arose from the  
308 hybridization between *F. ovina* (2x) and *F. ovina* (4x). Further research using nuclear loci is  
309 needed to confirm this hypothesis.

310 The diversity of fine fescue provides valuable genetic diversity for breeding and  
311 cultivar development. Breeding fine fescue cultivars for better disease resistance, heat  
312 tolerance, and traffic tolerance could be achieved through screening wild accessions and by  
313 introgressing desired alleles into elite cultivars. Some work has been done using *Festuca*  
314 accessions in the USDA Germplasm Resources Information Network (GRIN)  
315 (<https://www.ars-grin.gov>) to breed for improved forage production in fescue species [27].  
316 To date, there are 229 *F. ovina* and 486 *F. rubra* accessions in the USDA GRIN. To integrate  
317 this germplasm into breeding programs, plant breeders and other researchers need to  
318 confirm the ploidy level using flow cytometry and further identify them using molecular  
319 markers. Resources developed in this study could provide the tools to screen the germplasm  
320 accessions and refine the species identification so breeders can efficiently use these materials  
321 for breeding and genetics improvement of fine fescue species.

## 322 4. Materials and Methods

### 323 *Plant Material*

324 Seeds from the fine fescue cultivars seeds were obtained from the 2014 National  
325 Turfgrass Evaluation Program ([www.ntep.org](http://www.ntep.org), USA) and planted in the Plant Growth  
326 Facility at the University of Minnesota, St. Paul campus under 16 hours daylight (25 °C) and  
327 8 hours dark (16 °C) with weekly fertilization. Single genotypes of *F. brevipila* cv. Beacon, *F.*  
328 *rubra* ssp. *litoralis* cv. Shoreline, *F. rubra* ssp. *rubra* cv. Navigator II, *F. rubra* ssp. *fallax* cv.  
329 Treasure II, and *F. ovina* cv. Quatro were selected and used for chloroplast genome  
330 sequencing.

### 331 *Flow Cytometry*

332 To determine the ploidy level of the cultivars used for sequencing and compare them  
333 to previous work (2n=4x=28: *F. ovina*; 2n=6x=42: *F. rubra* ssp. *litoralis*, *F. rubra* ssp. *fallax*, and  
334 *F. brevipila*; 2n=8x=56: *F. rubra* ssp. *rubra*), flow cytometry was carried out using *Lolium*  
335 *perenne* cv. Artic Green (2n=2x=14) as the reference. Samples were prepared using CyStain  
336 PI Absolute P (Sysmex, product number 05-5022). Briefly, to prepare the staining solution  
337 for each sample, 12 µL propidium iodide (PI) was added to 12 mL of Cystain UV Precise P  
338 staining buffer with 6 µL RNase A. To prepare plant tissue, a total size of 0.5 cm x 0.5 cm  
339 leaf sample of the selected fine fescue was excised into small pieces using a razor blade in  
340 500 µL CyStain UV Precise P extraction buffer and passed through a 50 µm size filter  
341 (Sysmex, product number 04-004-2327). The staining solution was added to the flow-  
342 through to stain nuclei in each sample. Samples were stored on ice before loading the flow  
343 cytometer. Flow cytometry was carried out using the BD LSRII H4760 (LSRII) instrument  
344 with PI laser detector using 480V with 2,000 events at the University of Minnesota Flow  
345 Cytometry Resource (UCRF). Data was visualized and analyzed on BD FACSDiva 8.0.1  
346 software. To estimate the genome size, *L. perenne* DNA (5.66 pg/2C) was used as standard  
347 [28], USDA PI 230246 (2n=2x=14) was used as diploid fine fescue relative (unpublished data).  
348 To infer fine fescues ploidy, estimation was done using equations (1) and (2) [29].

349

$$350 \text{ Sample 2C DNA Content} = \text{Standard 2C DNA Content (pg DNA)} \times \frac{(\text{Sample G1 Peak Mean})}{(\text{Standard G1 Peak Mean})} \quad (1)$$

351

352 
$$\text{Sample Ploidy} = \frac{2n \times \text{Sample pg/Nucleus}}{\text{Diploid Relative pg/Nucleus}} \quad (2)$$

353 *DNA Extraction and Sequencing*

354 To extract DNA for chloroplast genome sequencing, 1 g of fresh leaves were collected  
355 from each genotype and DNA was extracted using the Wizard Genomic DNA Purification  
356 Kit (Promega, USA) following manufacturer instructions. DNA quality was examined on  
357 0.8% agarose gel and quantified via PicoGreen (Thermo Fisher, Catalog number: P11496).  
358 Sequencing libraries were constructed by NovoGene, Inc. (Davis, CA) using Nextera XT  
359 DNA Library Preparation Kit (Illumina) and sequenced in 150 bp paired-end mode, using  
360 the HiSeq X Ten platform (Illumina Inc., San Diego, CA, USA) with an average of 10 million  
361 reads per sample. All reads used in this study were deposited in the NCBI Sequence Read  
362 Archive (SRA) under BioProject PRJNA512126.

363

364 *Chloroplast Genome Assembly and Annotation*

365 Raw reads were trimmed of Illumina adaptor sequences using Trimmomatic (v. 0.32)  
366 [30]. Chloroplast genomes were *de novo* assembled using NovoPlasty v. 2.0 [31]. Briefly, *rbcL*  
367 gene sequence from diploid *F. ovina* (NCBI accession number: JX871940) was extracted and  
368 used as the seed to initiate the assembly. NovoPlasty assembler configuration was set as  
369 follows: *k-mer* size = 39; insert size = auto; insert range = 1.8; and insert range strict 1.3. Reads  
370 with quality score above 25 were used to complete the guided assembly using *F. ovina* (NCBI  
371 accession number: JX871940) as the reference. Assembled plastid genomes for each taxon  
372 were manually corrected by inspecting the alignments of reads used in the assembly. The  
373 assembled chloroplast genomes were deposited under BioProject PRJNA512126.

374 The assembled chloroplast genomes were annotated using the GeSeq pipeline [32] and  
375 corrected using DOGMA online interface (<https://dogma.cccb.utexas.edu>) [33]. BLAT  
376 protein, tRNA, rRNA, and DNA search identity threshold was set at 80% in the GeSeq  
377 pipeline using the default reference database with the generate codon-based alignments  
378 option turned on. tRNAs were also predicted via tRNAscan-SE v2.0 and ARAGORN v 1.2.38  
379 using the bacterial/plant chloroplast genetic code [34, 35]. The final annotation was  
380 manually inspected and corrected using results from both pipelines. The circular chloroplast  
381 map was drawn by the OrganellarGenomeDRAW tool (OGDRAW) [36].

382 *Nucleotide Polymorphism of Fine Fescue Species*

383 To identify genes with the most single nucleotide polymorphism, quality trimmed  
384 sequencing reads of the five fine fescues were mapped to the diploid *Festuca ovina*  
385 chloroplast genome (NCBI accession number: JX871940) using BWA v.0.7.17 [37]. SNPs and  
386 short indels were identified using bcftools v.1.9 with the setting “mpileup -Ou” and called  
387 via bcftools using the -mv function [38]. Raw SNPs were filtered using bcftools filter -s  
388 option to filter out SNPs with low quality (Phred score cutoff 20, coverage cutoff 20). The  
389 subsequent number of SNPs per gene and InDel number per gene was calculated using a  
390 custom perl script SNP\_vcf\_from\_gene\_gff.pl (<https://github.com/qiuxx221/fine-fescue->).

391 To identify simple sequence repeat (SSR) markers for plant identification,  
392 MicroSATellite identification tool (MISA v 1.0) was used with a threshold of 10, 5, 4, 3, 3, 3  
393 repeat units for mono-, di-, tri-, tetra-, penta-, and hexanucleotide SSRs, respectively [39].  
394 The identification of repetitive sequences and structure of whole chloroplast genome was  
395 done via PEPuter program online server (<https://bibiserv.cebitec.uni-bielefeld.de/reputer>)

396 [40]. Program configuration was set with minimal repeat size set as 20 bp and with sequence  
397 identify above 90%. Data was visualized using ggplot2 in R (v 3.5.3). Finally, the sliding  
398 window analysis was performed using DnaSP (v 5) with a window size of 600 bp, step size  
399 200 bp to detected highly variable regions in the fine fescue chloroplast genome [41].

#### 400 *Comparative Chloroplast Genomics Analysis*

401 To compare fine fescue species chloroplast genome sequence variations, the five  
402 complete chloroplast genomes were aligned and visualized using mVISTA, an online suite  
403 of computation tools with LAGAN mode [42, 43]. The diploid *Festuca ovina* (NCBI accession  
404 number: JX871940) chloroplast genome and annotation were used as the template for the  
405 alignment.

#### 406 *Phylogenetic Analysis of Fine Fescues and Related Festuca species*

407 To construct the phylogenetic tree of the fine fescues using the whole chloroplast  
408 genome sequence, chloroplast genomes of 8 species were downloaded from GenBank. Of  
409 the 8 downloaded genomes, perennial ryegrass (*Lolium perenne*, AM777385), Italian ryegrass  
410 (*Lolium multiflorum*, JX871942), diploid *Festuca ovina* (JX871940), tall fescue (*Festuca*  
411 *arundiancea*, FJ466687), meadow fescue (*Festuca pratensis*, JX871941), and wood fescue  
412 (*Festuca altissima*, JX871939) were within the *Festuca-Lolium* complex. Turfgrass species  
413 outside of *Festuca-Lolium* complex including creeping bentgrass (*Agrostis stolonifera* L.,  
414 EF115543) and *Cynodon dactylon* (KY024482.1) were used as an outgroup. All chloroplast  
415 genomes were aligned using the MAFFT program (v 7) [44]; alignments were inspected and  
416 manually adjusted. Maximum likelihood (ML) analyses was performed using the RAxML  
417 program (v 8.2.12) under GTR+G model with 1,000 bootstrap [45]. The phylogenetic tree was  
418 visualized using FigTree (v 1.4.3) (<https://github.com/rambaut/figtree>) [46].

## 419 5. Conclusions

420 Five newly-sequenced complete chloroplast genomes of fine fescue taxa were reported  
421 in this study. Chloroplast genome structure and gene contents are both conserved, with the  
422 presence and absence of *accD* pseudogene being the biggest structural variation between the  
423 *F. ovina* and the *F. rubra* complexes. We identified SSR repeats and long sequence repeats of  
424 fine fescues and discovered several unique repeats for marker development. The  
425 phylogenetic constructions of fine fescue species in the *Festuca - Lolium* complex suggested  
426 a robust and consistent relationship compared to the previous identification using flow  
427 cytometry. This information provided a reference for future fine fescue taxa identification.

#### 428 **Supplementary Materials:**

- 429 1. **Figure S1:** Flow cytometry nuclei population distribution of *L. perenne*, fine fescues, and diploid USDA  
430 PI accession. G1 populations were gated in red, G2 population was only gated in *L. perenne* in green.
- 431 2. **Table S1:** SSR loci types and number distributions of fine fescue species predicted using MISA  
432 program.
- 433 3. **Table S2:** Tandem repeat loci and repeat types predicted using PEPuter program in fine fescue species.
- 434 4. **Table S3:** SNPs number per gene distribution for fine fescue species. *rpoC2* gene has the most SNPs  
435 (31) in *F. rubra* complex comparing to *F. ovina* species.
- 436 5. **Table S4:** InDel number per gene distribution for fine fescue species. *ndhA* gene had the most InDels  
437 *F. rubra* species. *atpI* gene had the most InDesl in *F. ovina* species.
- 438 6. **Table S5:** Sliding window analysis using DnaSP at window size of 600 bp, step size 200 bp to detect  
439 highly variable regions in the fine fescue chloroplast genome

440

441 **Author Contributions:** Y. Q. performed the experiments, analyzed the data, and wrote the manuscript; C. H.  
442 helped analyze data, wrote perl scripts; Y. Y. helped with phylogenetic analysis; E. W. secured funding for this  
443 project, supervised this research, provided suggestions, and comments. All authors contributed to the revision  
444 of the manuscript and approved the final version.

445 **Funding:** This research is funded by the National Institute of Food and Agriculture, U.S. Department of  
446 Agriculture, Specialty Crop Research Initiative under award number 2017-51181-27222.

447 **Acknowledgments:** The authors would like to thank Minnesota Supercomputing Institute for the high-  
448 performance computing clusters. We would also like to thank Jill Ekar, Jason Motl, and Therese Martin for  
449 providing instruction on operating the flow cytometer.

450 **Conflicts of Interest:** The authors declare no conflict of interest.

451

452



453           **References**

- 454   1.       Clayton, W.D. and S.A. Renvoize, *Genera graminum. Grasses of the world*. Genera graminum. Grasses of  
455       the World., 1986. **13**.
- 456   2.       Jenkin, T.J., *Fescue Species (Festuca L.)*. In: Roemer, T. & W. Rudorf. Handbuch der Pflanzenzüchtung,  
457       1959(4): p. 418–434.
- 458   3.       Torrecilla, P. and P. Catalán, *Phylogeny of broad-leaved and fine-leaved Festuca lineages (Poaceae) based on*  
459       *nuclear ITS sequences*. Systematic Botany, 2002. **27**(2): p. 241-252.
- 460   4.       Ruemmele, B., L. Brilman, and D. Huff, *Fine fescue germplasm diversity and vulnerability*. Crop Science,  
461       1995. **35**(2): p. 313-316.
- 462   5.       Beard, J.B., *Turfgrass: Science and Culture*. 1972.
- 463   6.       Piper, C.V., *North American species of Festuca*. Vol. 10. 1906: US Government Printing Office.
- 464   7.       Hubbard, C.E., *Grasses. A guide to their structure, identification, uses, and distribution in the British Isles*.  
465       Grasses. A guide to their structure, identification, uses, and distribution in the British Isles., 1968.
- 466   8.       Huff, D.R. and A.J. Palazzo, *Fine fescue species determination by laser flow cytometry*. Crop Science, 1998.  
467       **38**(2): p. 445-450.
- 468   9.       Casler, M.D., *Turfgrass biology, genetics, and breeding*. 2003: John Wiley & Sons.
- 469   10.      Bonos, S.A. and D.R. Huff, *Cool-season grasses: Biology and breeding*. Turfgrass: Biology, use, and  
470       management, 2013(turfgrassbiolog): p. 591-660.
- 471   11.      Hebert, P.D., et al., *Biological identifications through DNA barcodes*. Proceedings of the Royal Society of  
472       London. Series B: Biological Sciences, 2003. **270**(1512): p. 313-321.
- 473   12.      Baldwin, B.G., et al., *The ITS region of nuclear ribosomal DNA: a valuable source of evidence on angiosperm*  
474       *phylogeny*. Annals of the Missouri Botanical Garden, 1995: p. 247-277.
- 475   13.      Demesure, B., N. Sodzi, and R. Petit, *A set of universal primers for amplification of polymorphic non -coding*  
476       *regions of mitochondrial and chloroplast DNA in plants*. Molecular Ecology, 1995. **4**(1): p. 129-134.
- 477   14.      Diekmann, K., et al., *Complete chloroplast genome sequence of a major allogamous forage species, perennial*  
478       *ryegrass (Lolium perenne L.)*. DNA Research, 2009. **16**(3): p. 165-176.
- 479   15.      Cahoon, A.B., et al., *The complete chloroplast genome of tall fescue (Lolium arundinaceum; Poaceae) and*  
480       *comparison of whole plastomes from the family Poaceae*. American Journal of Botany, 2010. **97**(1): p. 49-58.
- 481   16.      Hand, M.L., et al., *Plastome sequence determination and comparative analysis for members of the Lolium-*  
482       *Festuca grass species complex*. G3: Genes, Genomes, Genetics, 2013: p. g3. 112.005264.
- 483   17.      Huang, Y.-Y., et al., *Complete chloroplast genome sequence of common bermudagrass (Cynodon dactylon (L.)*  
484       *Pers.) and comparative analysis within the family Poaceae*. PloS One, 2017. **12**(6): p. e0179055.
- 485   18.      Cheng, T., et al., *Barcoding the kingdom Plantae: new PCR primers for ITS regions of plants with improved*  
486       *universality and specificity*. Molecular Ecology Resources, 2016. **16**(1): p. 138-149.
- 487   19.      Untergasser, A., et al., *Primer3—new capabilities and interfaces*. Nucleic Acids Research, 2012. **40**(15): p.  
488       e115-e115.
- 489   20.      Meyer, W.A. and C.R. Funk, *Progress and Benefits to Humanity from Breeding Cool-Season Grasses for Turf*  
490       *1. Contributions from breeding forage and turf grasses, 1989(contributionsfr): p. 31-48*.
- 491   21.      Yang, M., et al., *Transcriptomic analysis of the regulation of rhizome formation in temperate and tropical lotus*  
492       *(Nelumbo nucifera)*. Scientific Reports, 2015. **5**: p. 13059.
- 493   22.      Ma, X. and B. Huang, *Gibberellin-stimulation of rhizome elongation and differential GA-responsive proteomic*  
494       *changes in two grass species*. Frontiers in Plant Science, 2016. **7**: p. 905.

- 495 23. Rousseau-Gueutin, M., et al., *Potential functional replacement of the plastidic acetyl-CoA carboxylase*  
496 *subunit (accD) gene by recent transfers to the nucleus in some angiosperm lineages*. *Plant Physiology*, 2013.  
497 **161**(4): p. 1918-1929.
- 498 24. Fjellheim, S., et al., *Phylogeographical history of the widespread meadow fescue (Festuca pratensis Huds.)*  
499 *inferred from chloroplast DNA sequences*. *Journal of Biogeography*, 2006. **33**(8): p. 1470-1478.
- 500 25. Ebert, D. and R. Peakall, *Chloroplast simple sequence repeats (cpSSRs): technical resources and*  
501 *recommendations for expanding cpSSR discovery and applications to a wide array of plant species*. *Molecular*  
502 *Ecology Resources*, 2009. **9**(3): p. 673-690.
- 503 26. Dong, W., et al., *Highly variable chloroplast markers for evaluating plant phylogeny at low taxonomic levels*  
504 *and for DNA barcoding*. *PloS One*, 2012. **7**(4): p. e35071.
- 505 27. Robbins, M.D., J.E. Staub, and B.S. Bushman, *Development of fine-leaved Festuca grass populations*  
506 *identifies genetic resources having improved forage production with potential for wildfire control in the western*  
507 *United States*. *Euphytica*, 2016. **209**(2): p. 377-393.
- 508 28. Arumuganathan, K., et al., *Nuclear DNA content of thirteen turfgrass species by flow cytometry*. *Crop*  
509 *Science*, 1999. **39**(5): p. 1518-1521.
- 510 29. Doležel, J., J. Greilhuber, and J. Suda, *Estimation of nuclear DNA content in plants using flow cytometry*.  
511 *Nature Protocols*, 2007. **2**(9): p. 2233.
- 512 30. Bolger, A.M., M. Lohse, and B. Usadel, *Trimmomatic: a flexible trimmer for Illumina sequence data*.  
513 *Bioinformatics*, 2014. **30**(15): p. 2114-2120.
- 514 31. Dierckxsens, N., P. Mardulyn, and G. Smits, *NOVOPlasty: de novo assembly of organelle genomes from*  
515 *whole genome data*. *Nucleic Acids Research*, 2016. **45**(4): p. e18-e18.
- 516 32. Tillich, M., et al., *GeSeq—versatile and accurate annotation of organelle genomes*. *Nucleic Acids Research*,  
517 2017. **45**(W1): p. W6-W11.
- 518 33. Wyman, S.K., R.K. Jansen, and J.L. Boore, *Automatic annotation of organellar genomes with DOGMA*.  
519 *Bioinformatics*, 2004. **20**(17): p. 3252-3255.
- 520 34. Lowe, T.M. and S.R. Eddy, *tRNAscan-SE: a program for improved detection of transfer RNA genes in*  
521 *genomic sequence*. *Nucleic Acids Research*, 1997. **25**(5): p. 955-964.
- 522 35. Laslett, D. and B. Canback, *ARAGORN, a program to detect tRNA genes and tmRNA genes in nucleotide*  
523 *sequences*. *Nucleic Acids Research*, 2004. **32**(1): p. 11-16.
- 524 36. Lohse, M., O. Drechsel, and R. Bock, *OrganellarGenomeDRAW (OGDRAW): a tool for the easy generation*  
525 *of high-quality custom graphical maps of plastid and mitochondrial genomes*. *Current Genetics*, 2007. **52**(5-6):  
526 p. 267-274.
- 527 37. Li, H. and R. Durbin, *Fast and accurate short read alignment with Burrows–Wheeler transform*.  
528 *Bioinformatics*, 2009. **25**(14): p. 1754-1760.
- 529 38. Quinlan, A.R. and I.M. Hall, *BEDTools: a flexible suite of utilities for comparing genomic features*.  
530 *Bioinformatics*, 2010. **26**(6): p. 841-842.
- 531 39. Thiel, T., et al., *Exploiting EST databases for the development and characterization of gene-derived SSR-*  
532 *markers in barley (Hordeum vulgare L.)*. *Theoretical and Applied Genetics*, 2003. **106**(3): p. 411-422.
- 533 40. Kurtz, S., et al., *REPuter: the manifold applications of repeat analysis on a genomic scale*. *Nucleic Acids*  
534 *Research*, 2001. **29**(22): p. 4633-4642.
- 535 41. Librado, P. and J. Rozas, *DnaSP v5: a software for comprehensive analysis of DNA polymorphism data*.  
536 *Bioinformatics*, 2009. **25**(11): p. 1451-1452.

- 537 42. Brudno, M., et al., *LAGAN and Multi-LAGAN: efficient tools for large-scale multiple alignment of genomic*  
538 *DNA*. *Genome Research*, 2003. **13**(4): p. 721-731.
- 539 43. Frazer, K.A., et al., *VISTA: computational tools for comparative genomics*. *Nucleic Acids Research*, 2004.  
540 **32**(suppl\_2): p. W273-W279.
- 541 44. Katoh, K. and D.M. Standley, *MAFFT multiple sequence alignment software version 7: improvements in*  
542 *performance and usability*. *Molecular Biology and Evolution*, 2013. **30**(4): p. 772-780.
- 543 45. Stamatakis, A., *RAxML-VI-HPC: maximum likelihood-based phylogenetic analyses with thousands of taxa*  
544 *and mixed models*. *Bioinformatics*, 2006. **22**(21): p. 2688-2690.
- 545 46. Rambaut, A., *FigTree v1. 4*. 2012.
- 546
