# 1 Towards Improved Molecular Identification Tools in Fine Fescue (*Festuca L.*, 2 Poaceae) Turfgrasses: Nuclear Genome Size, Ploidy, and Chloroplast Genome 3 Sequencing

4 Yinjie Qiu<sup>a</sup>, Cory D. Hirsch<sup>b</sup>, Ya Yang<sup>c</sup> and Eric Watkins<sup>a\*</sup>

5 <sup>1</sup> Department of Horticultural Science, University of Minnesota, St. Paul, MN, 55108, USA;  
6 [qiuxx221@umn.edu](mailto:qiuxx221@umn.edu) (Y.Q.); [ewatkins@umn.edu](mailto:ewatkins@umn.edu) (E.W.)

7 <sup>2</sup> Department of Plant Pathology, University of Minnesota, St. Paul, MN, 55108, USA; [cdhirsch@umn.edu](mailto:cdhirsch@umn.edu) (C.  
8 H.)

9 <sup>3</sup> Department of Plant and Microbial Biology, University of Minnesota, St. Paul, MN, 55108, USA;  
10 [yayang@umn.edu](mailto:yayang@umn.edu) (Y.Y.)

11 \* Correspondence: [qiuxx221@umn.edu](mailto:qiuxx221@umn.edu) (Y.Q.); [ewatkins@umn.edu](mailto:ewatkins@umn.edu) (E.W.); Tel.: +1- 612-624-7496 (E.W.)

12 **Abstract:** Fine fescues (*Festuca L.*, Poaceae) are turfgrass species that perform well in low-  
13 input environments. Based on morphological characteristics, the most commonly-utilized  
14 fine fescues are divided into five taxa: three are subspecies within *F. rubra* L. and the  
15 remaining two are treated as species within the *F. ovina* L. complex. Morphologically, these  
16 five taxa are very similar, both identification and classification of fine fescues remain  
17 challenging. In an effort to develop identification methods for fescues, we used flow  
18 cytometry to estimate genome size, ploidy level, and sequenced the chloroplast genome of  
19 all five taxa. Fine fescue chloroplast genome sizes ranged from 133,331 to 133,841 bp and  
20 contained 113 to 114 genes. Phylogenetic relationship reconstruction using whole  
21 chloroplast genome sequences agreed with previous work based on morphology.  
22 Comparative genomics suggested unique repeat signatures for each fine fescue taxon that  
23 could potentially be used for marker development for taxon identification.

24 **Keywords:** Fine fescue, chloroplast genome, phylogeny, comparative genomics  
25

---

## 26 1. Introduction

27 With ca. 450 species, Fescues (*Festuca L.*, Poaceae) is a large and diverse genus of  
28 perennial grasses (Clayton and Renvoize 1986). Fescue species are distributed mostly in  
29 temperate zones of both the northern and southern hemispheres, but most commonly found  
30 in the northern hemisphere (Jenkin 1959). Several of the fescue species have been commonly  
31 used as turfgrass. Based on both leaf morphology and nuclear ITS sequences, fescue species  
32 can be divided into two groups: broad-leaved fescues and fine-leaved fescues (Torrecilla  
33 and Catalán 2002). Broad-leaved fescues commonly used as turfgrass include tall fescue  
34 (*Festuca arundinacea* Schreb.) and meadow fescue (*Festuca pratensis* Huds.). Fine-leaved  
35 fescues are a group of cool-season grasses that include five commonly used taxa called fine  
36 fescues. Fine fescues include hard fescue (*Festuca brevipila* Tracey,  $2n=6x=42$ ), sheep fescue  
37 (*Festuca ovina* L.,  $2n=4x=28$ ), strong creeping red fescue (*Festuca rubra* ssp. *rubra*  $2n=8x=56$ ),  
38 slender creeping red fescue (*Festuca rubra* ssp. *litoralis* (G. Mey.) Auquier  $2n=6x=42$ ), and  
39 Chewings fescue (*Festuca rubra* ssp. *fallax* (Thuill.) Nyman  $2n=6x=42$ ) (Ruemmele et al. 1995).  
40 All five taxa share very fine and narrow leaves and have been used for forage, turf, and  
41 ornamental purposes. They are highly tolerant to shade and drought, prefer low pH (5.5-  
42 6.5) and low fertility soils (Beard 1972). Additionally, fine fescues grow well in the shade or  
43 sun, have reduced mowing requirements, and do not need additional fertilizer or  
44 supplemental irrigation (Ruemmele et al. 1995).

45 Based on morphological and cytological features, fine fescues are currently divided into  
46 two groups referred to as the *F. rubra* complex (includes *F. rubra* ssp. *litoralis*, *F. rubra* ssp.

47 *rubra*, *F. rubra* ssp. *fallax*) and the non- rhizomatous *F. ovina* complex (includes *F. brevipila*  
48 and *F. ovina*) (Ruemmele et al. 1995). While it is relatively easy to separate fine fescue taxa  
49 into their proper complex based on the presence and absence of rhizome, it is challenging  
50 to identify taxon within the same complex. In the *F. rubra* complex, both ssp. *litoralis* and  
51 ssp. *rubra* are rhizomatous while ssp. *fallax* is non-rhizomatous. However, the separation of  
52 ssp. *litoralis* from ssp. *rubra* using rhizome length is challenging. Taxon identification within  
53 the *F. ovina* complex relies heavily on leaf characters; however, abundant morphological and  
54 ecotype diversity within *F. ovina* makes taxa identification difficult (Piper 1906). This is  
55 further complicated by inconsistent identification methods between different continents.  
56 For example, in the United States, sheep fescue is described as having a bluish gray leaf color  
57 and hard fescue leaf blade color is considered green (Beard 1972), while in Europe, it is the  
58 opposite (Hubbard 1968). Because the ploidy level of the five taxa varies from tetraploid to  
59 octoploid, beyond morphological classifications, laser flow cytometry has been used to  
60 determine ploidy level of fine fescues and some other fescue species (Huff and Palazzo  
61 1998). A wide range of DNA contents within each complex suggests that the evolutionary  
62 history of each named species is complicated, and interspecific hybridization might interfere  
63 with species determination using this approach. Plant breeders have been working to  
64 improve fine fescues for turf use for several decades, with germplasm improvement efforts  
65 focused on disease resistance, traffic tolerance, and ability to perform well under heat stress  
66 (Casler 2003). Turfgrass breeders have utilized germplasm collections from old turf areas as  
67 a source of germplasm (Bonos and Huff 2013); however, confirming the taxon identity in  
68 these collections has been challenging. A combination of molecular markers and flow  
69 cytometry could be a valuable tool for breeders to identify fine fescue germplasm (Hebert  
70 et al. 2003).

71 Due to the complex polyploidy history of fine fescues, sequencing plastid genomes  
72 provides a more cost-effective tool for taxon identification than the nuclear genome because  
73 it is often maternally inherited, lacks of heterozygosity, is present in high copies and usable  
74 even in partially degraded material (Bryan et al. 1999, Provan et al. 2001). Previous studies  
75 have developed universal polymerase chain reaction (PCR) primers to amplify non-coding  
76 polymorphic regions for DNA barcoding in plants for species identification (Baldwin et al.  
77 1995, Demesure et al. 1995). However, the polymorphisms discovered from these regions  
78 are often single nucleotide polymorphisms that are difficult to apply using PCR screening  
79 methods. For these reasons, it would be helpful to assemble chloroplast genomes and  
80 identify simple sequence repeat (SSR) and tandem repeats polymorphisms. Chloroplast  
81 genome sequencing has been simplified due to improved sequencing technology. In  
82 turfgrass species, high throughput sequencing has been used to assemble the chloroplast  
83 genomes of perennial ryegrass (*Lolium perenne* cv. Cashel) (Diekmann et al. 2009), tall fescue  
84 (*Lolium arundinacea* cv. Schreb) (Cahoon et al. 2010), diploid *Festuca ovina*, *Festuca pratensis*,  
85 *Festuca altissima* (Hand et al. 2013), and bermudagrass (*Cynodon dactylon*) (Huang et al. 2017).  
86 To date, there is limited molecular biology information on fine fescue taxon identification  
87 and their phylogenetic position among other turfgrass species (Hand et al. 2013, Cheng et  
88 al. 2016). In this study, we used flow cytometry to confirm the ploidy level of five fine fescue  
89 cultivars, each representing one of the five commonly utilized fine fescue taxon. We then  
90 reported the complete chloroplast genome sequences of these five taxa, carried out  
91 comparative genomics and phylogenetic inference. Based on the genome sequence we  
92 identified unique genome features among fine fescue taxa and predicted taxon specific SSR  
93 and tandem repeat loci for molecular marker development.

## 94 2. Results

### 95 2.1 Species Ploidy Level Confirmation

96 We used flow cytometry to estimate the ploidy levels of five fine fescue taxa by  
97 measuring the DNA content in each nucleus. DNA content was reflected by the flow  
98 cytometry mean PI-A value. Overall, fine fescue taxa had mean PI-A values roughly from  
99 110 to 180 (**Figure 1 and Figure S1**). *Festuca rubra* ssp. *rubra* cv. Navigator II ( $2n=8x=56$ ) had  
100 the highest mean PI-A value (181.434, %rCV 4.4). *Festuca rubra* ssp. *litoralis* cv. Shoreline  
101 ( $2n=6x=42$ ) and *F. rubra* ssp. *fallax* cv. Treasure II ( $2n=6x=42$ ) had similar mean PI-A values  
102 of 137.852, %rCV 3.7 and 145.864, %rCV 3.5, respectively. *Festuca brevipila* cv. Beacon  
103 ( $2n=6x=42$ ) had a mean PI-A of 165.25, %rCV 1.9, while *F. ovina* cv. Quatro ( $2n=4x=28$ ) had a  
104 mean PI-A of 108.43, %rCV 2.9. Standard reference *L. perenne* cv. Artic Green ( $2n=2x=14$ ) had  
105 a G1 phase mean PI-A of 63.91, %rCV 3.0. USDA *F. ovina* PI 230246 ( $2n=2x=14$ ) had a G1  
106 mean PI-A of 52.73 (histogram not shown). The estimated genome size of USDA PI 230246  
107 was 4.67 pg/2C. Estimated ploidy level of *F. brevipila* cv. Beacon was 6.3, *F. ovina* cv. Quatro  
108 was 4.11, *F. rubra* ssp. *rubra* cv. Navigator II was 6.9, *F. rubra* ssp. *litoralis* cv. Shoreline was  
109 5.2, and *F. rubra* ssp. *fallax* cv. Treasure II was 5.5 (**Table 1**). All newly estimated ploidy  
110 levels roughly correspond to previously reported ploidy levels based on chromosome  
111 counts.

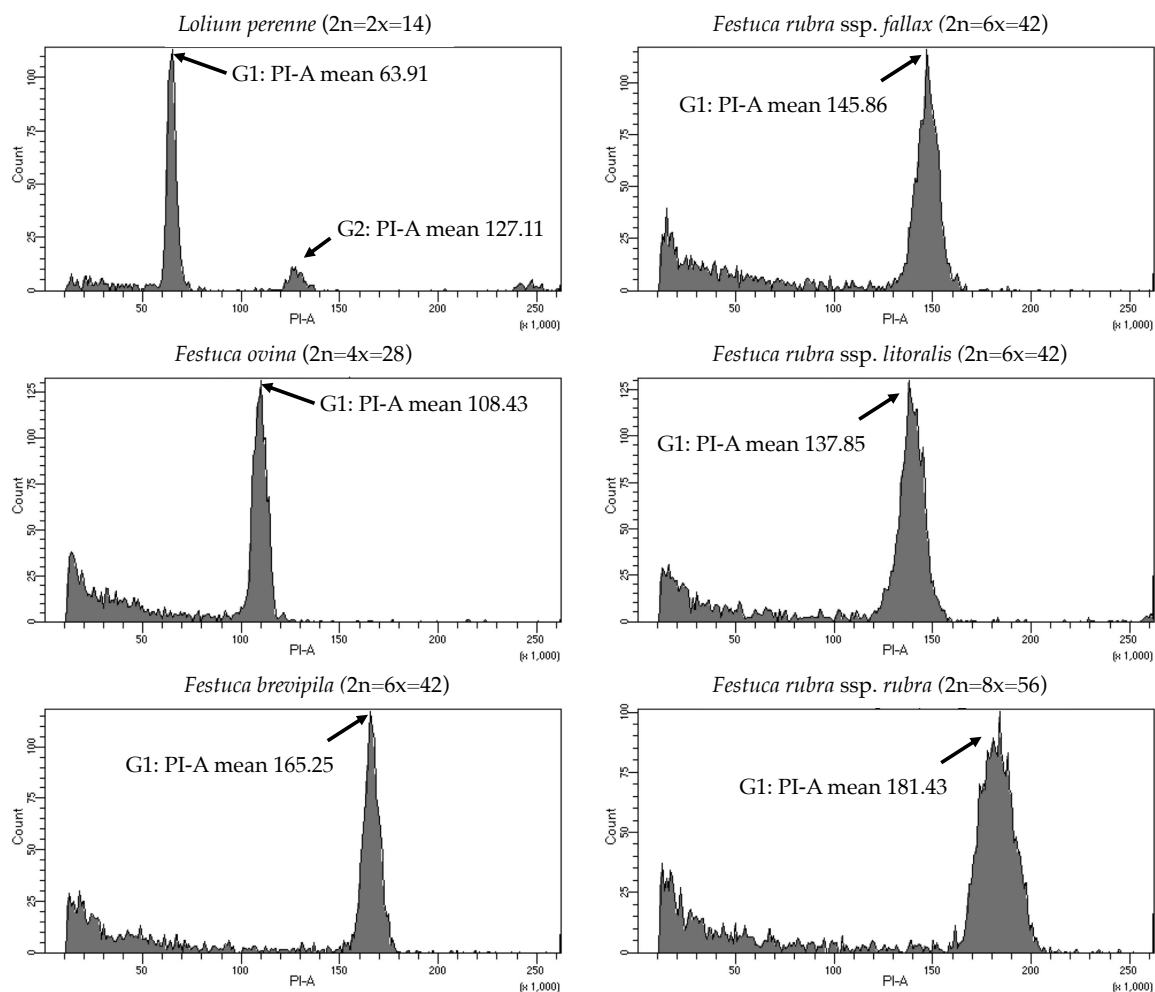

112

113 **Figure 1.** Flow cytometry results for the five fine fescue taxa. *Lolium perenne* ( $2n=2x=14$ ) was used as  
114 the reference. Flow cytometry was able to separate *F. rubra* ssp. *rubra* from the other two subspecies

115 in the *F. rubra* complex. The mean PI-A values of *F. rubra* ssp. *fallax* and *F. rubra* ssp. *litoralis* were  
 116 similar (145.86 to 137.85).

117 **Table 1.** Summary of flow cytometry statistics, genome size estimation, and ploidy level estimation  
 118 of fine fescue species. *Lolium perenne* 2C DNA content was used to calculate fine fescue and USDA *F.*  
 119 *ovina* PI 230246 genome size, calculated PI 230246 DNA content was used as reference to infer fine  
 120 fescue ploidy level

| Species name                          | Chromosome count | Cultivar name | Mean PI-A | %rCV * | Estimated Genome Size (pg/Nuclei) | Estimated Ploidy Level |
|---------------------------------------|------------------|---------------|-----------|--------|-----------------------------------|------------------------|
| <i>F. brevipila</i>                   | 2n=6x=42         | Beacon        | 165.3     | 1.9    | 14.6                              | 6.3                    |
| <i>F. ovina</i>                       | 2n=4x=28         | Quatro        | 108.4     | 2.9    | 9.6                               | 4.1                    |
| <i>F. ovina</i> PI 230246             | 2n=2x=14         | NA            | 52.7      | 3.1    | 4.7                               | 1.7                    |
| <i>F. rubra</i> ssp. <i>rubra</i>     | 2n=8x=56         | Navigator II  | 181.4     | 4.4    | 16.1                              | 6.9                    |
| <i>F. rubra</i> ssp. <i>litoralis</i> | 2n=6x=42         | Shoreline     | 137.9     | 3.7    | 12.2                              | 5.2                    |
| <i>F. rubra</i> ssp. <i>fallax</i>    | 2n=6x=42         | Treasure II   | 145.9     | 3.5    | 12.9                              | 5.5                    |
| <i>L. perenne</i>                     | 2n=2x=14         | Artic Green   | 63.9      | 3.0    | 5.7                               | 2.0                    |

121 \* %rCV: Quality of laser alignment. Low %rCV suggests high resolution sensitivity.

## 122 2.2 Plastid Genome Assembly and Annotation of Five Fescue Taxa

123 A total of 47,843,878 reads were produced from the five fine fescue taxa. After Illumina  
 124 adaptor removal, we obtained 47,837,438 reads. The assembled chloroplast genomes ranged  
 125 from 133,331 to 133,841 bp. The large single copy (LSC) and small single copy (SSC) regions  
 126 were similar in size between the sequenced fine fescue accessions (78 kb and 12 kb,  
 127 respectively). *Festuca ovina* and *F. brevipila* in the *F. ovina* complex had exactly the same size  
 128 inverted repeat (IR) region (42,476 bp). In the *F. rubra* complex, *F. rubra* ssp. *rubra* and *F.*  
 129 *rubra* ssp. *litoralis* had the same IR size (21,235 bp). Species in the *F. rubra* complex had a  
 130 larger chloroplast genome size compared to species in the *F. ovina* complex. All chloroplast  
 131 genomes shared similar GC content (38.4%) (**Figure 2, Table 2**). The fine fescue chloroplast  
 132 genomes encoded for 113-114 genes, including 37 transfer RNAs (tRNA), 4 ribosomal RNAs  
 133 (rRNA), and 72 protein-coding genes (**Table 2**). Genome structures were similar among all  
 134 five fine fescue taxa sequenced, except that the pseudogene *accD* was annotated in all three  
 135 subspecies of *F. rubra*, but not in the *F. ovina* complex (**Table S1**).

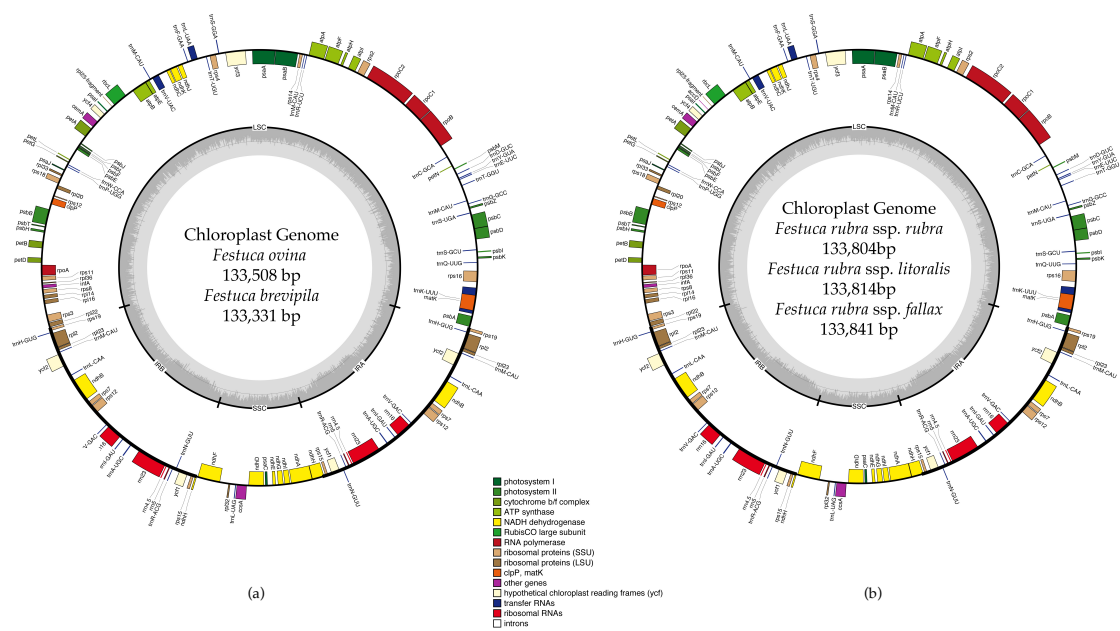

136

137 **Figure 2.** Whole chloroplast genome structure of *F. ovina* complex (a) and *F. rubra* complex (b). Genes  
 138 inside the circle are transcribed clockwise, genes outside are transcribed counter-clockwise. Genes  
 139 belong to different functional groups are color coded. GC content is represented by the dark gray  
 140 inner circle, the light gray corresponded to the AT content. IRA(B), inverted repeat A(B); LSC, large  
 141 single copy region; SSC, small single copy region.

142 **Table 2.** Characteristics of fine fescue chloroplast genomes.

|                        | <i>F. brevipila</i><br>cv. Beacon | <i>F. ovina</i><br>cv. Quatro | <i>F. rubra</i><br>ssp. <i>rubra</i><br>cv. Navigator II | <i>F. rubra</i><br>ssp.<br><i>litoralis</i><br>cv. Shoreline | <i>F. rubra</i> ssp.<br><i>fallax</i><br>cv. Treasure II |
|------------------------|-----------------------------------|-------------------------------|----------------------------------------------------------|--------------------------------------------------------------|----------------------------------------------------------|
| NCBI GenBank ID        | MN309822                          | MN309824                      | MN309825                                                 | MN309823                                                     | MN309826                                                 |
| Total Genome Size (bp) | 133,331                           | 133,508                       | 133,804                                                  | 133,814                                                      | 133,841                                                  |
| Large Single Copy (bp) | 78,462                            | 78,632                        | 78,888                                                   | 78,909                                                       | 78,882                                                   |
| Small Single Copy (bp) | 12,393                            | 12,400                        | 12,446                                                   | 12,435                                                       | 12,451                                                   |
| Inverted Repeat (bp)   | 42,476                            | 42,476                        | 42,470                                                   | 42,470                                                       | 42,508                                                   |
| Ratio of LSC (%)       | 58.85                             | 58.9                          | 58.96                                                    | 58.97                                                        | 58.94                                                    |
| Ratio of SSC (%)       | 9.29                              | 9.29                          | 9.3                                                      | 9.29                                                         | 9.3                                                      |
| Ratio of IRs (%)       | 31.86                             | 31.82                         | 31.74                                                    | 31.74                                                        | 31.76                                                    |
| GC content (%)         | 38.4                              | 38.4                          | 38.4                                                     | 38.4                                                         | 38.4                                                     |

144 **2.3 Chloroplast Genome IR Expansion and Contraction**

145 Contraction and expansion of the IR regions resulted in the size variation of chloroplast  
 146 genomes. We examined the four junctions in the chloroplast genomes, LSC/IRa, LSC/IRb,  
 147 SSC/IRa, and SSC/IRb of the fine fescue and the model turfgrass species *L. perenne*. Although  
 148 the chloroplast genome of fine fescue taxa were highly similar, some structural variations

149 were still found in the IR/LSC and IR/SSC boundary. Similar to *L. perenne*, fine fescue taxa  
 150 chloroplast genes *rpl22-rps19*, *rps19-psbA* were located in the junction of IR and LSC; *rps15-*  
 151 *ndhF* and *ndhH-rps15* were located in the junction of IR/SSC. In the *F. ovina* complex, the  
 152 *rps19* gene was 37 bp into the LSC/IRb boundary while in the *F. rubra* complex and *L. perenne*,  
 153 the *rps19* gene was 36 bp into the LSC/IRb boundary (Figure 3). The *rps15* gene was 308 bp  
 154 from the IRb/SSC boundary in *F. ovina* complex, 307 bp in *F. rubra* complex, and 302 bp in *L.*  
 155 *perenne*. Both the *ndhH* and the pseudogene fragment of the *ndhH* (*fn dhH*) genes spanned  
 156 the junction of the IR/SSC. The *fn dhH* gene crossed the IRb/SSC boundary with 32 bp into  
 157 SSC in *F. brevipila* and *F. ovina*, 9 bp in *F. rubra* ssp. *rubra* and *F. rubra* ssp. *litoralis*, 10 bp in  
 158 *F. rubra* ssp. *fallax*, and 7 bp in *L. perenne*. The *ndhF* gene was 88 bp from the IRb/SSC  
 159 boundary in *F. brevipila* and *F. ovina*, 91 bp in *F. rubra* ssp. *rubra*, 84 bp in *F. rubra* ssp. *litoralis*,  
 160 77 bp in *F. rubra* ssp. *fallax*, and 102 bp in *L. perenne*. Finally, the *psbA* gene was 87 bp apart  
 161 from the IRa/LSC boundary into the LSC in *L. perenne* and *F. ovina* complex taxa but 83 bp  
 162 in the *F. rubra* complex taxa.

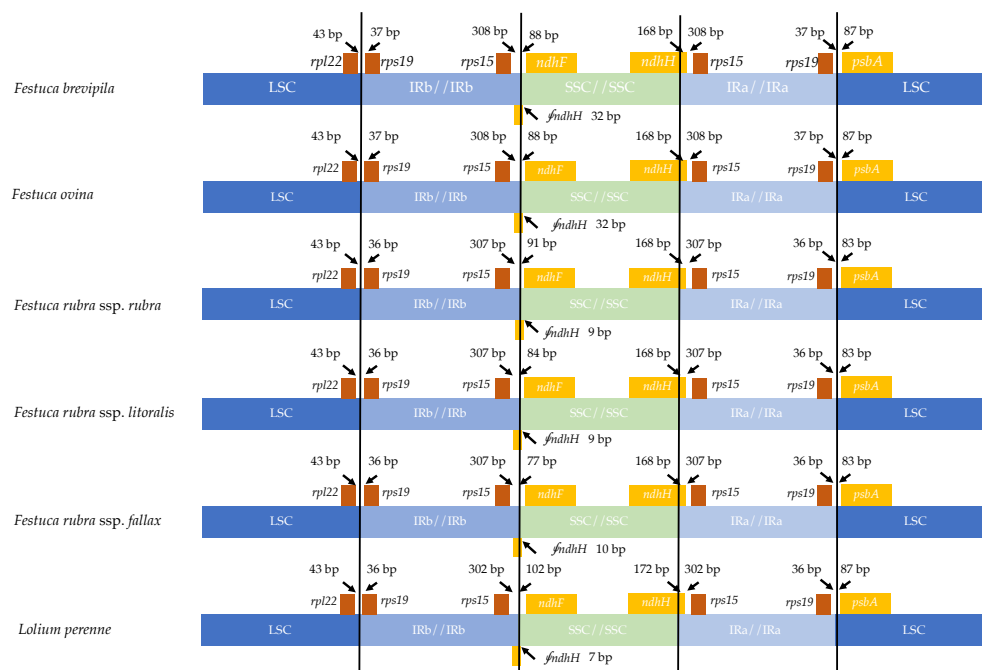

163

164 **Figure 3.** Comparison for border positions of LSC, SSC and IR regions among five fine fescues and *L.*  
 165 *perenne*. Genes are denoted by boxes, and the gap between the genes and the boundaries are indicated  
 166 by the number of bases unless the gene coincides with the boundary. Extensions of genes are also  
 167 indicated above the boxes.

#### 168 2.4 Whole Chloroplast Genome Comparison and Repetitive Element Identification

169 Genome-wide comparison among five fine fescue taxa showed high sequence similarity  
 170 with most variations located in intergenic regions (Figure 4). To develop markers for species  
 171 screening, we predicted a total of 217 SSR markers for fine fescue taxa sequenced (*F. brevipila*  
 172 39; *F. ovina* 45; *F. rubra* ssp. *rubra* 45; *F. rubra* ssp. *litoralis* 46; *F. rubra* ssp. *fallax* 42) that  
 173 included 17 different repeat types for the fine fescue species (Figure 5a, Table S2). The most  
 174 frequent repeat type was A/T repeats, followed by AT/AT. The pentamer AAATT/AATTT  
 175 repeat was only presented in the rhizomatous *F. rubra* ssp. *litoralis* and *F. rubra* ssp. *rubra*,  
 176 while ACCAT/ATGGT was only found in *F. ovina* complex species *F. brevipila* and *F. ovina*.  
 177 Similar to SSR loci prediction, we also predicted long repeats for the fine fescue species and  
 178 identified a total of 171 repeated elements ranging in size from 20 to 51 bp (Figure 5b, Table

179 **S3)** Complementary (C) matches were only identified in *F. brevipila* and *F. ovina*. *F. rubra*  
180 species had more palindromic (P) and reverse (R) matches. Number of forward (F) matches  
181 were similar between five taxa. Selected polymorphic regions were validated by PCR and  
182 gel electrophoresis assay (**Figure S2**).

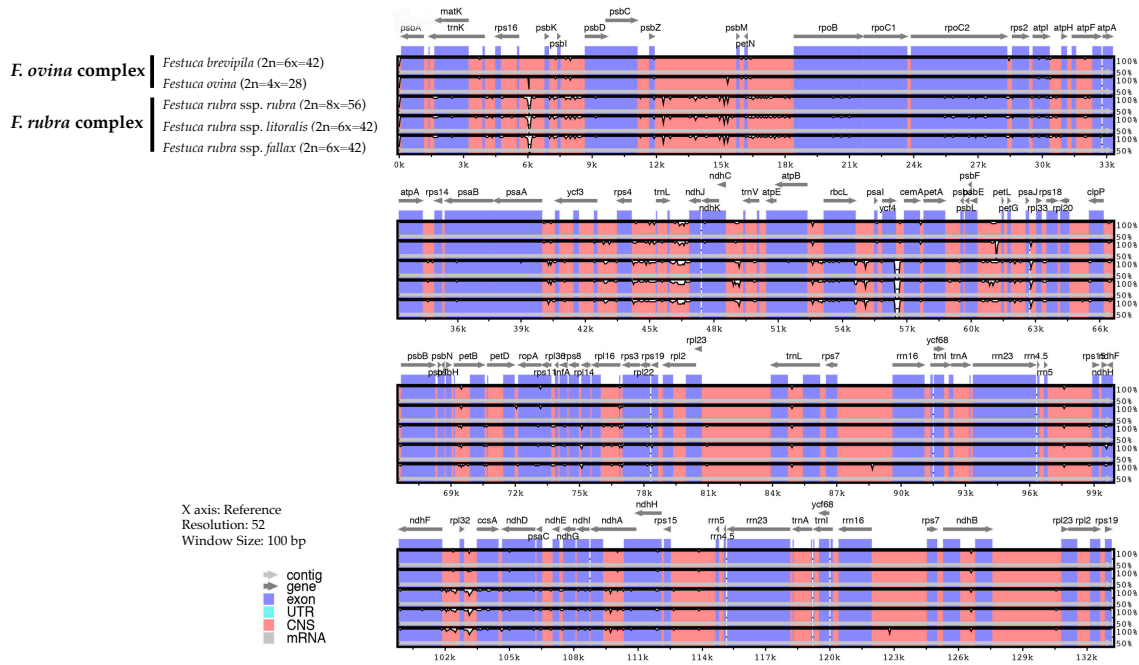

183 **Figure 4.** Sequence identity plot of fine fescues chloroplast genome sequences with *F. ovina* (2x) as the  
184 reference using mVISTA. A cut-off of 70% identity was used for the plots, and the percent of identity  
185 varies from 50% to 100% as noted on the y-axis. Most of the sequence variations between fine fescues  
186 were in intergenic regions. Taxa in the *F. ovina* complex, *F. brevipila* and *F. ovina* showed high sequence  
187 similarity. Similarly, subspecies within *F. rubra* complex also showed high sequence similarity.  
188

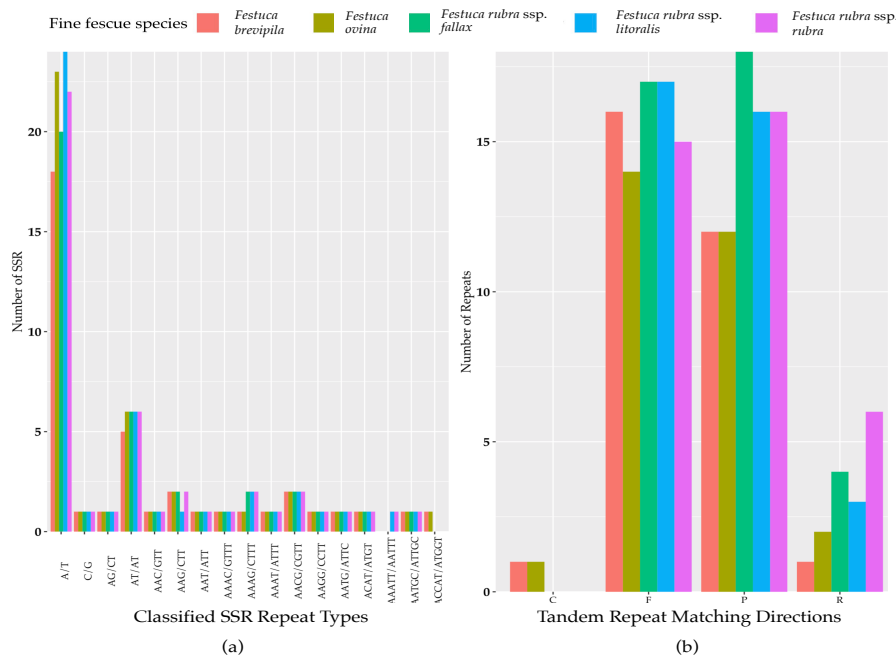

189 **Figure 5.** (a) SSR repeat type and numbers in the five fine fescue taxa sequenced. Single nucleotide  
190 repeat type has the highest frequency. No hexanucleotide repeats were identified in the fine fescue  
191

192 chloroplast genomes sequenced. One penta-nucleotide repeat type (AAATT/AATTT) is unique to *F.*  
 193 *rubra* ssp. *rubra* and *F. rubra* ssp. *litoralis*; One penta-nucleotide repeat type (ACCAT/ATGGT) is  
 194 unique to *F. brevipila* and *F. ovina*. (b) Long repeats sequences in fine fescue chloroplast genomes.  
 195 Complement (C) match was only identified in the *F. ovina* complex; Reverse (R) match has the most  
 196 number variation in fine fescues.

197

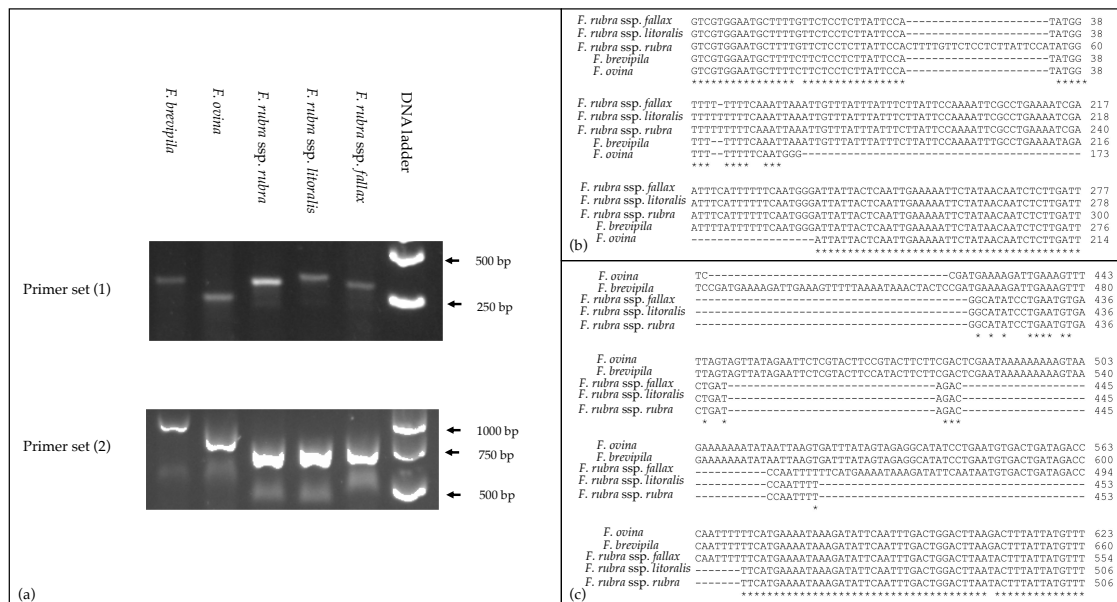

198

199 **Figure S2.** Examples of PCR validation of predicted repeat regions based on fine fescue chloroplast  
 200 genomes. PCR primers were developed using Primer3 module(Untergasser, Cutcutache et al. 2012).  
 201 Primers used for the PCR assays (1) Forward primer 5'-GTCGIGGAATGCTTTTGTTC-3'; Reverse  
 202 primer 5'-AGTGGATTCATCAGATGATACA-3'; (2) Forward primer 5'-TTCCTCTTTTCATTG-  
 203 CAAAGTGGT AT-3'; Reverse primer 5'-TACTCGGAGTTTCAATCCTTCC-3'. PCR products were  
 204 examined on 1% agarose gel and gel images showed fragment size separation between different  
 205 taxa(a). Figure (b) and (c) showed partial sequence alignment of regions amplified by primer sets (1  
 206 and 2).

### 207 2.5 SNP and InDel Distribution in the Coding Sequence of Five Fine Fescue Species

208 To identify single nucleotide polymorphisms (SNPs, non-reference allele in this  
 209 content), we used the diploid *F. ovina* chloroplast genome (JX871940.1) as the reference for  
 210 the mapping and used the genome annotation file to identify genic and non-genic SNPs.  
 211 The total genic and non-genic sequence of (JX871940.1) were 60,582 and 72,583 bp,  
 212 respectively. We found SNP polymorphisms were over-present within intergenic regions in  
 213 the *F. ovina* complex (~0.3 SNP/Kbp more), while were under-present in the *F. rubra* complex  
 214 (~0.5 SNP/Kbp less). Most InDels were located in intergenic regions of the fine fescue species  
 215 (Table 3). Between *F. ovina* and the *F. rubra* complex, the *ropC2* gene had the most SNPs (4  
 216 vs 31). The *rbcl* gene also has a high level of variation (1 vs 14.3). In addition, *rpoB*, *ccsA*,  
 217 NADH dehydrogenase subunit genes (*ndhH*, *ndhF*, *ndhA*), and ATPase subunit genes (*atpA*,  
 218 *atpB*, *atpF*) also showed variation between *F. ovina* and *F. rubra* complexes. Less SNP and  
 219 InDel variation were found within each complex (Table 3, Table S4 and S5).

220 **Table 3.** Distribution of SNPs and InDels for the five fine fescue taxa sequenced in this study.



| Species                                       | <i>F. brevipila</i> | <i>F. ovina</i> | <i>F. rubra</i> ssp.<br><i>rubra</i> | <i>F. rubra</i> ssp.<br><i>litoralis</i> | <i>F. rubra</i> ssp.<br><i>fallax</i> |
|-----------------------------------------------|---------------------|-----------------|--------------------------------------|------------------------------------------|---------------------------------------|
| Total number of SNPs                          | 98                  | 134             | 638                                  | 615                                      | 624                                   |
| SNPs in the coding region                     | 35                  | 52              | 306                                  | 301                                      | 300                                   |
| SNPs in intergenic region                     | 63                  | 82              | 332                                  | 314                                      | 324                                   |
| SNPs per Kbp in genic region                  | 0.5777              | 0.8583          | 5.0510                               | 4.9685                                   | 4.9520                                |
| SNPs per Kbp in non-genic region              | 0.8680              | 1.1297          | 4.5741                               | 4.3261                                   | 4.4639                                |
| Total number of InDels                        | 112                 | 102             | 149                                  | 156                                      | 149                                   |
| InDels in the coding region                   | 22                  | 17              | 27                                   | 26                                       | 27                                    |
| InDels in intergenic region                   | 90                  | 85              | 122                                  | 130                                      | 122                                   |
| Percentage of InDels in the intergenic region | 80.36               | 83.33           | 81.88                                | 83.33                                    | 81.88                                 |
| Average sequencing depth                      | 171.61              | 86.81           | 101.58                               | 77.04                                    | 50.94                                 |

## 221 2.6 Nucleotide Diversity Calculation

222 A sliding window analysis successfully detected highly variable regions in the fine  
 223 fescue chloroplast genomes (**Figure 6, Table S6**). The average nucleotide diversity ( $\Pi$ )  
 224 among fine fescue taxa was relatively low (0.00318). The IR region showed lower variability  
 225 than the LSC and SSC region. There were several divergent loci having a  $\Pi$  value greater  
 226 than 0.01 (*psbK-psbI*, *trnfM-trnE*, *trnC-rpoB*, *psbH-petB*, *trnL-trnF*, *trnS-rps4*, *aptB-rbcL-psaI*,  
 227 and *rpl32-trnL*), but mostly within intergenic regions. The *rbcL-psaI* region contained a  
 228 highly variable *accD-like* region in some fine fescue taxa, so we looked at the structural  
 229 variation of 10 taxa in the *Festuca - Lolium* complex. We found taxa in broad-leaved fescue  
 230 and *F. rubra* complex had similar structure, while *F. ovina* (2x, 4x) and *F. brevipila* had a 276  
 231 bp deletion in the *rbcL-psaI* intergenic region (**Figure 7**).

232

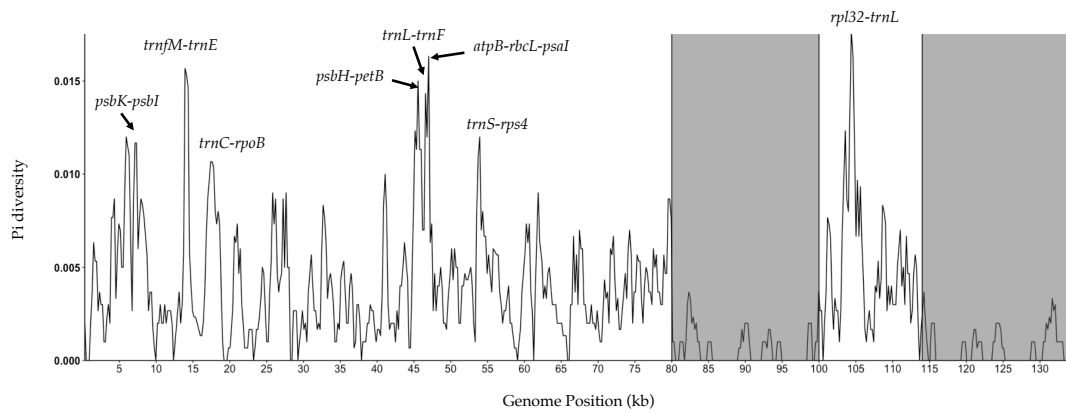

233

234 **Figure 6.** Sliding window analysis of fine fescue whole chloroplast genomes. Window size: 600 bp, step  
 235 size: 200 bp. X-axis: the position of the midpoint of a window (kb). Y-axis: nucleotide diversity of each  
 236 window. Inverted repeat regions are highlighted in grey. *rpl32-trnL* region has the most nucleotide  
 237 diversity followed by *psbH-petB-trnL-trnF-trnS-rps4* region.

238

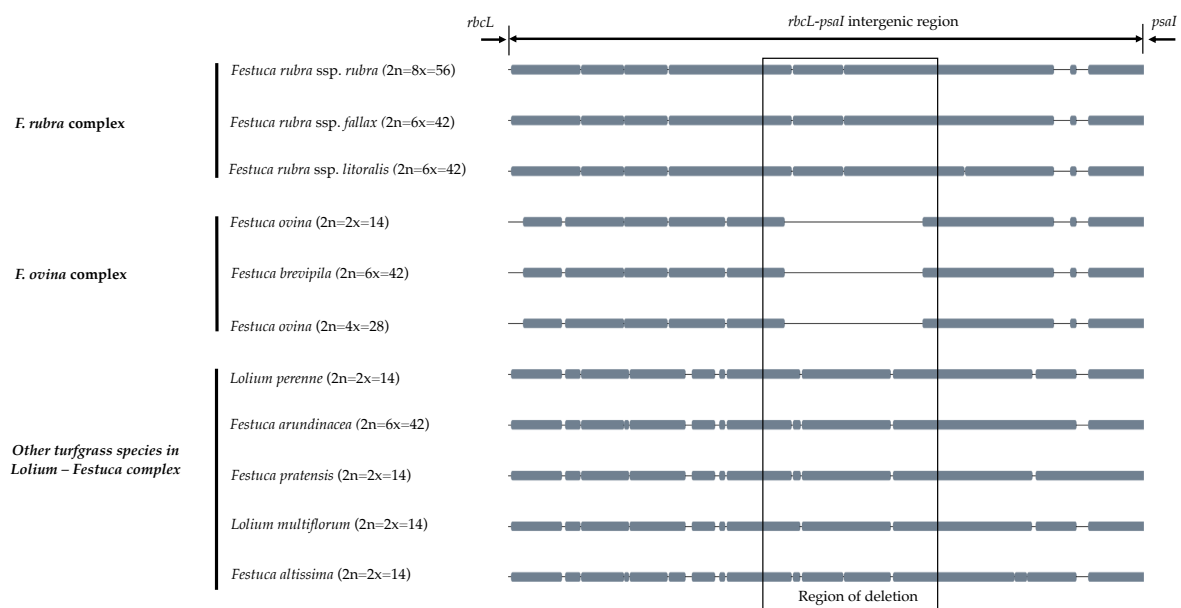

239

240 **Figure 7.** The alignment of *rbcL-psaI* intergenic sequence shows that the pseudogene *accD* is missing  
 241 in both *F. ovina* (2x, 4x) and *F. brevipila* but present in the *F. rubra* complex and other species examined  
 242 in this study. Species were ordered by complexes.

### 243 2.7 Phylogenetic Reconstruction of Fine Fescue Species

244 We reconstructed the phylogenetic relationships of taxa within the *Festuca - Lolium*  
 245 complex using the chloroplast genomes sequenced in our study and eight publicly available  
 246 complete chloroplast genomes including six taxa within the *Festuca-Lolium* complex (**Figure**  
 247 **8**). The dataset included 125,824 aligned characters, of which 3,923 were parsimony-  
 248 informative and 91.11% characters are constant. The five fine fescue taxa were split into two  
 249 clades ([ML]BS=100). In the *F. ovina* complex, two *F. ovina* accessions included in the

250 phylogenetic analysis, a diploid one from GenBank, and a tetraploid one newly sequenced  
251 in this study are paraphyletic to *F. brevipila* ([ML]BS=100). All three subspecies of *F. rubra*  
252 formed a strongly supported clade ([ML]BS=100). Together they are sisters to the *F. ovina*  
253 complex ([ML]BS=100).

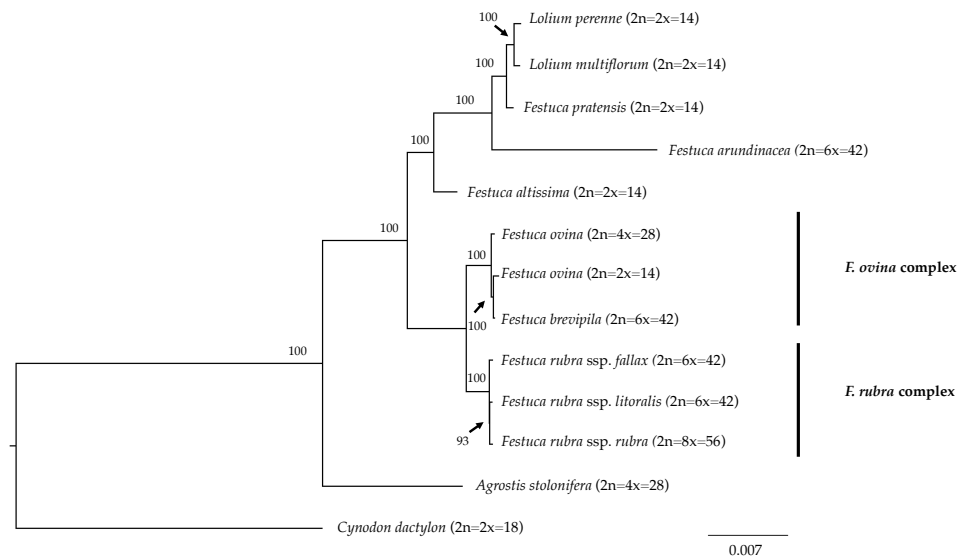

254

255 **Figure 8.** Maximum likelihood (ML) phylogram of the *Festuca - Lolium* complex with 1,000 bootstrap  
256 replicates. Fine fescues were grouped into previous named complexes (*F. ovina* and *F. rubra*), sister to  
257 broad leaved fescues in the *Festuca - Lolium* complex.

### 258 3. Discussion

259 In this study, we used flow cytometry to determine the ploidy level of five fine fescue  
260 cultivars, assembled the chloroplast genomes for each, and identified structural variation  
261 and mutation hotspots. We also identified candidate loci for marker development to  
262 facilitate fine fescue species identification. Additionally, we reconstructed the phylogenetic  
263 relationships of the *Festuca-Lolium* complex using plastid genome information generated in  
264 this study along with other publicly-available plastid genomes.

265 While most crop plants are highly distinctive from their close relatives, *Festuca* is a  
266 species-rich genus that contains species with highly similar morphology and different  
267 ploidy level. Consequently, it is difficult for researchers to interpret species identity. In our  
268 case, flow cytometry was able to successfully separate fine fescue taxa *F. brevipila* cv. Beacon,  
269 *F. ovina* cv. Quatro and *F. rubra* ssp. *rubra* cv. Navigator II based on the estimated ploidy  
270 levels. However, it is difficult to distinguish between *F. rubra* ssp. *litoralis* cv. Shoreline and  
271 *F. rubra* ssp. *fallax* cv. Treasure II as they had similar PI-A values based on flow cytometry.  
272 We noticed that the average mean PI-A of the diploid *L. perenne* (63.91) was higher than the  
273 mean PI-A of diploid *F. ovina* (52.73), suggesting that *F. ovina* taxa have smaller genome size  
274 than *L. perenne*. The ploidy estimation in the *F. ovina* complex are fairly consistent while the  
275 estimations of genome sizes in the *F. rubra* complex are smaller than we expected, even  
276 though these two complexes are closely related. Indeed, a similar finding was reported by  
277 Huff et al (Huff and Palazzo 1998) who reported that *F. brevipila* has a larger genome size  
278 than *F. rubra* ssp. *litoralis* and *F. rubra* ssp. *fallax*, both of which have the same ploidy level as  
279 *F. brevipila*. The range of variation in DNA content within each complex suggest a  
280 complicated evolutionary history in addition to polyploidization (Huff and Palazzo 1998).

281 When we cannot identify taxon based on the ploidy level, we need different approaches  
282 to identify them. The presence and absence of rhizome formation could be taken into  
283 consideration; for example, *F. rubra* ssp. *fallax* cv. Treasure II is a bunch type turfgrass, while  
284 *F. rubra* ssp. *litoralis* cv. Shoreline forms short and slender rhizomes (Meyer and Funk 1989).  
285 This method may not be effective because rhizome formation can be greatly affected by  
286 environmental conditions (Yang et al. 2015, Ma and Huang 2016).

287 To further develop molecular tools to facilitate species identification, we carried out  
288 chloroplast genome sequencing. We assembled the complete chloroplast genomes of five  
289 low-input turfgrass fine fescues using Illumina sequencing. Overall, the chloroplast  
290 genomes had high sequence and structure similarity among all five fine fescue taxa  
291 sequenced, especially within each complex. All five chloroplast genomes share similar gene  
292 content except for the three species in the *F. rubra* complex that have a pseudogene Acetyl-  
293 coenzyme A carboxylase carboxyl transferase subunit (*accD*). The *accD* pseudogene is either  
294 partially or completely absent in some monocots. Instead, a nuclear-encoded ACC enzyme  
295 has been found to replace the plastic *accD* gene function in some angiosperm lineage  
296 (Rousseau-Gueutin et al. 2013). Indeed, even though the *accD* pseudogene is missing in the  
297 *F. brevipila* chloroplast genome, the gene transcript was identified in a transcriptome  
298 sequencing dataset (unpublished data), suggesting that this gene has been translocated to  
299 nucleus genome. Previous studies have shown that broad-leaf fescues, *L. perenne*, *O. sativa*,  
300 and *H. vulgare* all had the pseudogene *accD* gene, while it was absent in diploid *F. ovina*, *Z.*  
301 *mays*, *S. bicolor*, *T. aestivum*, and *B. distachyon* (Hand et al. 2013). Broad-leaf and fine-leaf  
302 fescues diverged around 9 Mya ago (Fjellheim et al. 2006), which raises an interesting  
303 question about the mechanisms of the relocation of *accD* among closely related taxa in the  
304 *Festuca-Lolium* complex and even within fine fescue species.

305 In plants, chloroplast genomes are generally considered “single copy” and lack  
306 recombination due to maternal inheritance (Ebert and Peakall 2009). For this reason,  
307 chloroplast genomes are convenient for developing genetic markers for distinguishing  
308 species and subspecies. We have identified a number of repeat signatures that are unique to  
309 a single species or species complex in fine fescue. For example, complement match is only  
310 identified in *F. ovina* complex, and *F. rubra* complex has more reversed matches. We also  
311 identified two SSR repeats unique to each of the two complexes. The first one consists of  
312 AAATT/AATTT repeat units is unique to *F. rubra* ssp. *litoralis* and *F. rubra* ssp. *rubra*, and  
313 the second one consists of ACCAT/ATGGT repeat units is unique to *F. brevipila* and *F. ovina*.  
314 In cases like the identification of hexaploids *F. brevipila*, *F. rubra* ssp. *fallax*, and *Festuca rubra*  
315 ssp. *litoralis*, it is critical to have these diagnostic repeats given all three taxa share similar  
316 PI-A values from flow cytometry. Taxon-specific tandem repeats could also aid the SSR  
317 repeats for species identification. We used chloroplast sequence developed candidate  
318 primer sets to solve the problem. Primer set (1) provided a clear separation of *F. rubra* ssp.  
319 *litoralis* cv. Shoreline and *F. rubra* ssp. *fallax* cv. Treasure II when flow cytometry was not  
320 able to separate them. Primer set (2) provided clear separation of *F. brevipila* cv. Beacon and  
321 *F. ovina* cv. Quatro, which provided an alternative method for *F. ovina* complex taxa  
322 identification. By combining both flow cytometry and candidate primer sets developed in  
323 this study, researchers will be able to identify fine fescue taxa within and between two  
324 complexes.

325 Nucleotide diversity analysis suggested that several variable genome regions exist  
326 among the five fine fescue taxa sequenced in this study. These variable regions included  
327 previously known highly variable chloroplast regions such as *trnL-trnF* and *rpl32-trnL*  
328 (Demesure et al. 1995, Dong et al. 2012). These regions have undergone rapid nucleotide

329 substitution and are potentially informative molecular markers for characterization of fine  
330 fescue species.

331 Phylogeny inferred from DNA sequence is valuable for understanding the evolutionary  
332 context of a species. The phylogenetic relationship of fine fescue using whole plastid  
333 genome sequences agrees with previous classification based on genome size estimation and  
334 morphology (Huff and Palazzo 1998, Cheng et al. 2016). The *F. ovina* complex includes *F.*  
335 *ovina* and *F. brevipila* and the *F. rubra* complex includes *F. rubra* ssp. *rubra*, *F. rubra* ssp. *litoralis*  
336 and *F. rubra* ssp. *fallax*, with the two rhizomatous subspecies (ssp. *rubra* and ssp. *litoralis*)  
337 being sister to each other. Within the *Festuca* – *Lolium* complex, fine fescues are monophyletic  
338 and together sister to a clade consists of broad-leaved fescues and *Lolium*. In our analysis, *F.*  
339 *brevipila* (6x) is nested within *F. ovina* and sister to the diploid *F. ovina*. It is likely that *F.*  
340 *brevipila* arose from the hybridization between *F. ovina* (2x) and *F. ovina* (4x). Considering  
341 the complex evolutionary history of this genus, further research using nuclear loci sequences  
342 are needed to provide a more accurate phylogeny tree and validate this hypothesis.

343 The diversity of fine fescue provides valuable genetic diversity for breeding and  
344 cultivar development. Breeding fine fescue cultivars for better disease resistance, heat  
345 tolerance, and traffic tolerance could be achieved through screening wild accessions and by  
346 introgressing desired alleles into elite cultivars. Some work has been done using *Festuca*  
347 accessions in the USDA Germplasm Resources Information Network (GRIN)  
348 (<https://www.ars-grin.gov>) to breed for improved forage production in fescue species  
349 (Robbins et al. 2016). To date, there are 229 *F. ovina* and 486 *F. rubra* accessions in the USDA  
350 GRIN. To integrate this germplasm into breeding programs, plant breeders and other  
351 researchers need to confirm the ploidy level using flow cytometry and further identify them  
352 using molecular markers. Resources developed in this study could provide the tools to  
353 screen the germplasm accessions and refine the species identification so breeders can  
354 efficiently use these materials for breeding and genetics improvement of fine fescue species.

#### 355 4. Materials and Methods

##### 356 *Plant Material*

357 Seeds from the fine fescue cultivars were obtained from the 2014 National Turfgrass  
358 Evaluation Program ([www.ntep.org](http://www.ntep.org), USA) and planted in the Plant Growth Facility at the  
359 University of Minnesota, St. Paul campus under 16 hours daylight (25 °C) and 8 hours dark  
360 (16 °C) with weekly fertilization. Single genotypes of *F. brevipila* cv. Beacon, *F. rubra* ssp.  
361 *litoralis* cv. Shoreline, *F. rubra* ssp. *rubra* cv. Navigator II, *F. rubra* ssp. *fallax* cv. Treasure II,  
362 and *F. ovina* cv. Quatro were selected and used for chloroplast genome sequencing.

##### 363 *Flow Cytometry*

364 To determine the ploidy level of the cultivars used for sequencing and compare them  
365 to previous work (2n=4x=28: *F. ovina*; 2n=6x=42: *F. rubra* ssp. *litoralis*, *F. rubra* ssp. *fallax*, and  
366 *F. brevipila*; 2n=8x=56: *F. rubra* ssp. *rubra*), flow cytometry was carried out using *Lolium*  
367 *perenne* cv. Artic Green (2n=2x=14) as the reference. Samples were prepared using CyStain  
368 PI Absolute P (Sysmex, product number 05-5022). Briefly, to prepare the staining solution  
369 for each sample, 12 µL propidium iodide (PI) was added to 12 mL of Cystain UV Precise P  
370 staining buffer with 6 µL RNase A. To prepare plant tissue, a total size of 0.5 cm x 0.5 cm  
371 leaf sample of the selected fine fescue was excised into small pieces using a razor blade in  
372 500 µL CyStain UV Precise P extraction buffer and passed through a 50 µm size filter  
373 (Sysmex, product number 04-004-2327). The staining solution was added to the flow-

374 through to stain nuclei in each sample. Samples were stored on ice before loading the flow  
375 cytometer. Flow cytometry was carried out using the BD LSRII H4760 (LSRII) instrument  
376 with PI laser detector using 480V with 2,000 events at the University of Minnesota Flow  
377 Cytometry Resource (UCRF). Data was visualized and analyzed on BD FACSDiva 8.0.1  
378 software. To estimate the genome size, *L. perenne* DNA (5.66 pg/2C) was used as standard  
379 (Arumuganathan, Tallury et al. 1999), USDA PI 230246 (2n=2x=14) was used as diploid fine  
380 fescue relative (unpublished data). To infer fine fescues ploidy, estimation was done using  
381 equations (1) and (2) (Doležel et al. 2007).

382

$$383 \text{ Sample 2C DNA Content} = \text{Standard 2C DNA Content (pg DNA)} \times \frac{(\text{Sample G1 Peak Mean})}{(\text{Standard G1 Peak Mean})} \quad (1)$$

384

$$385 \text{ Sample Ploidy} = \frac{2n \times \text{Sample pg/Nucleus}}{\text{Diploid Relative pg/Nucleus}} \quad (2)$$

### 386 *DNA Extraction and Sequencing*

387 To extract DNA for chloroplast genome sequencing, 1 g of fresh leaves were collected  
388 from each genotype and DNA was extracted using the Wizard Genomic DNA Purification  
389 Kit (Promega, USA) following manufacturer instructions. DNA quality was examined on  
390 0.8% agarose gel and quantified via PicoGreen (Thermo Fisher, Catalog number: P11496).  
391 Sequencing libraries were constructed by NovoGene, Inc. (Davis, CA) using Nextera XT  
392 DNA Library Preparation Kit (Illumina) and sequenced in 150 bp paired-end mode, using  
393 the HiSeq X Ten platform (Illumina Inc., San Diego, CA, USA) with an average of 10 million  
394 reads per sample. All reads used in this study were deposited in the NCBI Sequence Read  
395 Archive (SRA) under BioProject PRJNA512126.

396

### 397 *Chloroplast Genome Assembly and Annotation*

398 Raw reads were trimmed of Illumina adaptor sequences using Trimmomatic (v. 0.32)  
399 (Bolger et al. 2014). Chloroplast genomes were *de novo* assembled using NovoPlasty v. 2.0  
400 (Dierckxsens et al. 2016). Briefly, *rbcl* gene sequence from diploid *F. ovina* (NCBI accession  
401 number: JX871940) was extracted and used as the seed to initiate the assembly. NovoPlasty  
402 assembler configuration was set as follows: *k-mer* size = 39; insert size = auto; insert range =  
403 1.8; and insert range strict 1.3. Reads with quality score above 25 were used to complete the  
404 guided assembly using *F. ovina* (NCBI accession number: JX871940) as the reference.  
405 Assembled plastid genomes for each taxon were manually corrected by inspecting the  
406 alignments of reads used in the assembly. The assembled chloroplast genomes were  
407 deposited under BioProject PRJNA512126, GenBank accession numbers MN309822-  
408 MN309826.

409 The assembled chloroplast genomes were annotated using the GeSeq pipeline (Tillich,  
410 Lehwark et al. 2017) and corrected using DOGMA online interface  
411 (<https://dogma.cbb.utexas.edu>) (Wyman, Jansen et al. 2004). BLAT (a BLAST-like  
412 alignment tool (Kent 2002) protein, tRNA, rRNA, and DNA search identity threshold was  
413 set at 80% in the GeSeq pipeline using the default reference database with the generate  
414 codon-based alignments option turned on. tRNAs were also predicted via tRNAscan-SE  
415 v2.0 and ARAGORN v 1.2.38 using the bacterial/plant chloroplast genetic code (Lowe and  
416 Eddy 1997, Laslett and Canback 2004). The final annotation was manually inspected and  
417 corrected using results from both pipelines. The circular chloroplast map was drawn by the  
418 OrganellarGenomeDRAW tool (OGDRAW) (Lohse et al. 2007).

#### 419 Nucleotide Polymorphism of Fine Fescue Species

420 To identify genes with the most single nucleotide polymorphism, quality trimmed  
421 sequencing reads of the five fine fescues were mapped to the diploid *Festuca ovina*  
422 chloroplast genome (NCBI accession number: JX871940) using BWA v.0.7.17 (Li and Durbin  
423 2009). SNPs and short indels were identified using bcftools v.1.9 with the setting “mpileup  
424 -Ou” and called via bcftools using the -mv function (Quinlan and Hall 2010). Raw SNPs  
425 were filtered using bcftools filter -s option to filter out SNPs with low quality (Phred score  
426 cutoff 20, coverage cutoff 20). The subsequent number of SNPs per gene and InDel number  
427 per gene was calculated using a custom perl script SNP\_vcf\_from\_gene\_gff.pl  
428 (<https://github.com/qiuxx221/fine-fescue->).

429 To identify simple sequence repeat (SSR) markers for plant identification,  
430 MlCroSATellite identification tool (MISA v 1.0) was used with a threshold of 10, 5, 4, 3, 3, 3  
431 repeat units for mono-, di-, tri-, tetra-, penta-, and hexanucleotide SSRs, respectively (Thiel  
432 et al. 2003). The identification of repetitive sequences and structure of whole chloroplast  
433 genome was done via REPuter program online server ([https://bibiserv.cebitec.uni-](https://bibiserv.cebitec.uni-bielefeld.de/reputer)  
434 [bielefeld.de/reputer](https://bibiserv.cebitec.uni-bielefeld.de/reputer)) (Kurtz et al. 2001). Program configuration was set with minimal repeat  
435 size set as 20 bp and with sequence identify above 90%. Data was visualized using ggplot2  
436 in R (v 3.5.3). Finally, the sliding window analysis was performed using DnaSP (v 5) with a  
437 window size of 600 bp, step size 200 bp to detected highly variable regions in the fine fescue  
438 chloroplast genome (Librado and Rozas 2009).

#### 439 Comparative Chloroplast Genomics Analysis

440 To compare fine fescue species chloroplast genome sequence variations, the five  
441 complete chloroplast genomes were aligned and visualized using mVISTA, an online suite  
442 of computation tools with LAGAN mode (Brudno et al. 2003, Frazer et al. 2004). The diploid  
443 *Festuca ovina* (NCBI accession number: JX871940) chloroplast genome and annotation were  
444 used as the template for the alignment.

#### 445 Phylogenetic Analysis of Fine Fescues and Related *Festuca* species

446 To construct the phylogenetic tree of the fine fescues using the whole chloroplast  
447 genome sequence, chloroplast genomes of 8 species were downloaded from GenBank. Of  
448 the 8 downloaded genomes, perennial ryegrass (*Lolium perenne*, AM777385), Italian ryegrass  
449 (*Lolium multiflorum*, JX871942), diploid *Festuca ovina* (JX871940), tall fescue (*Festuca*  
450 *arundiancea*, FJ466687), meadow fescue (*Festuca pratensis*, JX871941), and wood fescue  
451 (*Festuca altissima*, JX871939) were within the *Festuca*-*Lolium* complex. Turfgrass species  
452 outside of *Festuca*-*Lolium* complex including creeping bentgrass (*Agrostis stolonifera* L.,  
453 EF115543) and *Cynodon dactylon* (KY024482.1) were used as an outgroup. All chloroplast  
454 genomes were aligned using the MAFFT program (v 7) (Kato and Standley 2013);  
455 alignments were inspected and manually adjusted. Maximum likelihood (ML) analyses was  
456 performed using the RAxML program (v 8.2.12) under GTR+G model with 1,000 bootstrap  
457 (Stamatakis 2006). The phylogenetic tree was visualized using FigTree (v 1.4.3)  
458 (<https://github.com/rambaut/figtree>) (Rambaut 2012).

#### 459 5. Conclusions

460 Five newly-sequenced complete chloroplast genomes of fine fescue taxa were reported  
461 in this study. Chloroplast genome structure and gene contents are both conserved, with the  
462 presence and absence of *accD* pseudogene being the biggest structural variation between the

463 *F. ovina* and the *F. rubra* complexes. We identified SSR repeats and long sequence repeats of  
464 fine fescues and discovered several unique repeats for marker development. The  
465 phylogenetic constructions of fine fescue species in the *Festuca - Lolium* complex suggested  
466 a robust and consistent relationship compared to the previous identification using flow  
467 cytometry. This information provided a reference for future fine fescue taxa identification.

468 **Supplementary Materials:**

- 469 1. **Figure S1.** Flow cytometry nuclei population distribution of *L. perenne*, fine fescues, and diploid USDA  
470 PI accession. G1 populations were gated in red, G2 population was only gated in *L. perenne* in green.
- 471 2. **Figure S2.** Examples of PCR validation of predicted repeat regions based on fine fescue chloroplast  
472 genomes.
- 473 3. **Table S1.** Fine fescue chloroplast genomes gene content by gene category.
- 474 4. **Table S2.** SSR loci types and number distributions of fine fescue species predicted using MISA  
475 program.
- 476 5. **Table S3.** Tandem repeat loci and repeat types predicted using PEPuter program in fine fescue species.
- 477 6. **Table S4.** SNPs number per gene distribution for fine fescue species. *rpoC2* gene has the most SNPs  
478 (31) in *F. rubra* complex comparing to *F. ovina* species.
- 479 7. **Table S5.** InDel number per gene distribution for fine fescue species. *ndhA* gene had the most InDels  
480 *F. rubra* species. *atpI* gene had the most InDels in *F. ovina* species.
- 481 8. **Table S6.** Sliding window analysis using DnaSP at window size of 600 bp, step size 200 bp to detect  
482 highly variable regions in the fine fescue chloroplast genome

483

484 **Author Contributions:** Y. Q. performed the experiments, analyzed the data, and wrote the manuscript; C. H.  
485 helped analyze data, wrote perl scripts; Y. Y. helped with phylogenetic analysis; E. W. secured funding for this  
486 project, supervised this research, provided suggestions, and comments. All authors contributed to the revision  
487 of the manuscript and approved the final version.

488 **Funding:** This research is funded by the National Institute of Food and Agriculture, U.S. Department of  
489 Agriculture, Specialty Crop Research Initiative under award number 2017-51181-27222.

490 **Acknowledgments:** The authors would like to thank Minnesota Supercomputing Institute for the high-  
491 performance computing clusters. We would also like to thank Jill Ekar, Jason Motl, and Therese Martin for  
492 providing instruction on operating the flow cytometer.

493 This manuscript has been released as a pre-print at bioRxiv, (Qiu, et al. 2019)

494 **Conflicts of Interest:** The authors declare no conflict of interest.

495

496



497 **References**

- 498 Arumuganathan, K., S. Tallury, M. Fraser, A. Bruneau and R. Qu (1999). "Nuclear DNA content of thirteen  
499 turfgrass species by flow cytometry." Crop science **39**(5): 1518-1521.
- 500 Baldwin, B. G., M. J. Sanderson, J. M. Porter, M. F. Wojciechowski, C. S. Campbell and M. J. Donoghue (1995).  
501 "The ITS region of nuclear ribosomal DNA: a valuable source of evidence on angiosperm phylogeny."  
502 Annals of the Missouri botanical garden: 247-277.
- 503 Beard, J. B. (1972). "Turfgrass: Science and culture."
- 504 Bolger, A. M., M. Lohse and B. Usadel (2014). "Trimmomatic: a flexible trimmer for Illumina sequence data."  
505 Bioinformatics **30**(15): 2114-2120.
- 506 Bonos, S. A. and D. R. Huff (2013). "Cool-season grasses: Biology and breeding." Turfgrass: Biology, use, and  
507 management(turfgrassbiolog): 591-660.
- 508 Brudno, M., C. B. Do, G. M. Cooper, M. F. Kim, E. Davydov, E. D. Green, A. Sidow, S. Batzoglou and N. C. S.  
509 Program (2003). "LAGAN and Multi-LAGAN: efficient tools for large-scale multiple alignment of genomic  
510 DNA." Genome research **13**(4): 721-731.
- 511 Bryan, G., J. McNicoll, G. Ramsay, R. Meyer and W. De Jong (1999). "Polymorphic simple sequence repeat  
512 markers in chloroplast genomes of Solanaceous plants." Theoretical and Applied Genetics **99**(5): 859-867.
- 513 Cahoon, A. B., R. M. Sharpe, C. Mysayphonh, E. J. Thompson, A. D. Ward and A. Lin (2010). "The complete  
514 chloroplast genome of tall fescue (*Lolium arundinaceum*; Poaceae) and comparison of whole plastomes  
515 from the family Poaceae." American Journal of botany **97**(1): 49-58.
- 516 Casler, M. D. (2003). Turfgrass biology, genetics, and breeding, John Wiley & Sons.
- 517 Cheng, T., C. Xu, L. Lei, C. Li, Y. Zhang and S. Zhou (2016). "Barcoding the kingdom Plantae: new PCR primers  
518 for ITS regions of plants with improved universality and specificity." Molecular Ecology Resources **16**(1):  
519 138-149.
- 520 Clayton, W. D. and S. A. Renvoize (1986). "Genera graminum. Grasses of the world." Genera graminum.  
521 Grasses of the World. **13**.
- 522 Demesure, B., N. Sodji and R. Petit (1995). "A set of universal primers for amplification of polymorphic non-  
523 coding regions of mitochondrial and chloroplast DNA in plants." Molecular ecology **4**(1): 129-134.
- 524 Diekmann, K., T. R. Hodkinson, K. H. Wolfe, R. van den Bekerom, P. J. Dix and S. Barth (2009). "Complete  
525 chloroplast genome sequence of a major allogamous forage species, perennial ryegrass (*Lolium perenne*  
526 L.)." DNA research **16**(3): 165-176.
- 527 Dierckxsens, N., P. Mardulyn and G. Smits (2016). "NOVOPlasty: de novo assembly of organelle genomes from  
528 whole genome data." Nucleic acids research **45**(4): e18-e18.
- 529 Doležel, J., J. Greilhuber and J. Suda (2007). "Estimation of nuclear DNA content in plants using flow  
530 cytometry." Nature protocols **2**(9): 2233.
- 531 Dong, W., J. Liu, J. Yu, L. Wang and S. Zhou (2012). "Highly variable chloroplast markers for evaluating plant  
532 phylogeny at low taxonomic levels and for DNA barcoding." PloS one **7**(4): e35071.
- 533 Ebert, D. and R. Peakall (2009). "Chloroplast simple sequence repeats (cpSSRs): technical resources and  
534 recommendations for expanding cpSSR discovery and applications to a wide array of plant species."  
535 Molecular Ecology Resources **9**(3): 673-690.
- 536 Fjellheim, S., O. A. Rognli, K. Fosnes and C. Brochmann (2006). "Phylogeographical history of the widespread  
537 meadow fescue (*Festuca pratensis* Huds.) inferred from chloroplast DNA sequences." Journal of  
538 Biogeography **33**(8): 1470-1478.
- 539 Frazer, K. A., L. Pachter, A. Poliakov, E. M. Rubin and I. Dubchak (2004). "VISTA: computational tools for  
540 comparative genomics." Nucleic acids research **32**(suppl\_2): W273-W279.

- 541 Hand, M. L., G. C. Spangenberg, J. W. Forster and N. O. Cogan (2013). "Plastome sequence determination and  
542 comparative analysis for members of the *Lolium-Festuca* grass species complex." *G3: Genes, Genomes,*  
543 *Genetics*: g3. 112.005264.
- 544 Hebert, P. D., A. Cywinska, S. L. Ball and J. R. Dewaard (2003). "Biological identifications through DNA  
545 barcodes." *Proceedings of the Royal Society of London. Series B: Biological Sciences* **270**(1512): 313-321.
- 546 Huang, Y.-Y., S.-T. Cho, M. Haryono and C.-H. Kuo (2017). "Complete chloroplast genome sequence of  
547 common bermudagrass (*Cynodon dactylon* (L.) Pers.) and comparative analysis within the family  
548 Poaceae." *PloS one* **12**(6): e0179055.
- 549 Hubbard, C. E. (1968). "Grasses. A guide to their structure, identification, uses, and distribution in the British  
550 Isles." *Grasses. A guide to their structure, identification, uses, and distribution in the British Isles.*
- 551 Huff, D. R. and A. J. Palazzo (1998). "Fine fescue species determination by laser flow cytometry." *Crop science*  
552 **38**(2): 445-450.
- 553 Jenkin, T. J. (1959). "Fescue Species (*Festuca* L.)." In: Roemer, T. & W. Rudolf. *Handbuch der*  
554 *Pflanzenzüchtung*(4): 418-434.
- 555 Katoh, K. and D. M. Standley (2013). "MAFFT multiple sequence alignment software version 7: improvements  
556 in performance and usability." *Molecular biology and evolution* **30**(4): 772-780.
- 557 Kent, W. J. (2002). "BLAT—the BLAST-like alignment tool." *Genome research* **12**(4): 656-664.
- 558 Kurtz, S., J. V. Choudhuri, E. Ohlebusch, C. Schleiermacher, J. Stoye and R. Giegerich (2001). "REPuter: the  
559 manifold applications of repeat analysis on a genomic scale." *Nucleic acids research* **29**(22): 4633-4642.
- 560 Laslett, D. and B. Canback (2004). "ARAGORN, a program to detect tRNA genes and tmRNA genes in  
561 nucleotide sequences." *Nucleic acids research* **32**(1): 11-16.
- 562 Li, H. and R. Durbin (2009). "Fast and accurate short read alignment with Burrows–Wheeler transform."  
563 *bioinformatics* **25**(14): 1754-1760.
- 564 Librado, P. and J. Rozas (2009). "DnaSP v5: a software for comprehensive analysis of DNA polymorphism  
565 data." *Bioinformatics* **25**(11): 1451-1452.
- 566 Lohse, M., O. Drechsel and R. Bock (2007). "OrganellarGenomeDRAW (OGDRAW): a tool for the easy  
567 generation of high-quality custom graphical maps of plastid and mitochondrial genomes." *Current genetics*  
568 **52**(5-6): 267-274.
- 569 Lowe, T. M. and S. R. Eddy (1997). "tRNAscan-SE: a program for improved detection of transfer RNA genes in  
570 genomic sequence." *Nucleic acids research* **25**(5): 955-964.
- 571 Ma, X. and B. Huang (2016). "Gibberellin-stimulation of rhizome elongation and differential GA-responsive  
572 proteomic changes in two grass species." *Frontiers in plant science* **7**: 905.
- 573 Meyer, W. A. and C. R. Funk (1989). "Progress and Benefits to Humanity from Breeding Cool-Season Grasses  
574 for Turf 1." *Contributions from breeding forage and turf grasses*(contributionsfr): 31-48.
- 575 Piper, C. V. (1906). *North American species of Festuca*, US Government Printing Office.
- 576 Provan, J., W. Powell and P. M. Hollingsworth (2001). "Chloroplast microsatellites: new tools for studies in  
577 plant ecology and evolution." *Trends in ecology & evolution* **16**(3): 142-147.
- 578 Qiu, Y., C. D. Hirsch, Y. Yang and E. Watkins (2019). "Chloroplast Genome Sequencing and Comparative  
579 Analysis for Fine Fescue (*Festuca* L., Poaceae) Turfgrasses." *bioRxiv*: 708149.
- 580 Quinlan, A. R. and I. M. Hall (2010). "BEDTools: a flexible suite of utilities for comparing genomic features."  
581 *Bioinformatics* **26**(6): 841-842.
- 582 Rambaut, A. (2012). *FigTree v1. 4*.

583 Robbins, M. D., J. E. Staub and B. S. Bushman (2016). "Development of fine-leaved *Festuca* grass populations  
584 identifies genetic resources having improved forage production with potential for wildfire control in the  
585 western United States." *Euphytica* 209(2): 377-393.

586 Rousseau-Gueutin, M., X. Huang, E. Higginson, M. Ayliffe, A. Day and J. N. Timmis (2013). "Potential  
587 functional replacement of the plastidic acetyl-CoA carboxylase subunit (accD) gene by recent transfers to  
588 the nucleus in some angiosperm lineages." *Plant physiology* 161(4): 1918-1929.

589 Ruemmele, B., L. Brillman and D. Huff (1995). "Fine fescue germplasm diversity and vulnerability." *Crop*  
590 *science* 35(2): 313-316.

591 Stamatakis, A. (2006). "RAxML-VI-HPC: maximum likelihood-based phylogenetic analyses with thousands of  
592 taxa and mixed models." *Bioinformatics* 22(21): 2688-2690.

593 Thiel, T., W. Michalek, R. Varshney and A. Graner (2003). "Exploiting EST databases for the development and  
594 characterization of gene-derived SSR-markers in barley (*Hordeum vulgare* L.)." *Theoretical and applied*  
595 *genetics* 106(3): 411-422.

596 Tillich, M., P. Lehwark, T. Pellizzer, E. S. Ulbricht-Jones, A. Fischer, R. Bock and S. Greiner (2017). "GeSeq-  
597 versatile and accurate annotation of organelle genomes." *Nucleic acids research* 45(W1): W6-W11.

598 Torrecilla, P. and P. Catalán (2002). "Phylogeny of broad-leaved and fine-leaved *Festuca* lineages (Poaceae)  
599 based on nuclear ITS sequences." *Systematic Botany* 27(2): 241-252.

600 Untergasser, A., I. Cutcutache, T. Koressaar, J. Ye, B. C. Faircloth, M. Remm and S. G. Rozen (2012). "Primer3-  
601 new capabilities and interfaces." *Nucleic acids research* 40(15): e115-e115.

602 Wyman, S. K., R. K. Jansen and J. L. Boore (2004). "Automatic annotation of organellar genomes with  
603 DOGMA." *Bioinformatics* 20(17): 3252-3255.

604 Yang, M., L. Zhu, C. Pan, L. Xu, Y. Liu, W. Ke and P. Yang (2015). "Transcriptomic analysis of the regulation of  
605 rhizome formation in temperate and tropical lotus (*Nelumbo nucifera*)." *Scientific reports* 5: 13059.

606
